# Supplementary material
Source: Royal Society of Chemistry journal article supplement (doi:10.1039/d6cp00842a)
Supplement: d6cp00842a1.pdf [file d6cp00842a1.pdf]

## Supporting Information

to

Benchmarking B3LYP, PBE0 and M06L for nuclear spin–spin couplings against  
CC3: influence of geometry optimization

by

Elif Küçükefe, Rodrigo A. Cormanich and Stephan P. A. Sauer

April 17, 2026

**Table S1** The SSCC values (in Hz) for all molecules and couplings in the study. All of the results reported are for for the  $^1\text{H}$ ,  $^{13}\text{C}$ ,  $^{15}\text{N}$ ,  $^{17}\text{O}$ , and  $^{19}\text{F}$  isotopes. CCSD(T)/aug-cc-pCVQZ optimized geometries from Faber et al. study.

| Molecule          | Coupling          | Geometry optimization method | SSCC calculation method | FC      | SD    | PSO    | DSO   | Total   |
|-------------------|-------------------|------------------------------|-------------------------|---------|-------|--------|-------|---------|
| CO                | $^1J_{\text{CO}}$ | CCSD(T)/aug-cc-pCVQZ         | B3LYP/pcJ-2             | 11.64   | -6.66 | 14.54  | 0.10  | 19.62   |
| CO                | $^1J_{\text{CO}}$ | CCSD(T)/aug-cc-pCVQZ         | PBE0/pcJ-2              | 13.28   | -6.70 | 14.50  | 0.10  | 21.19   |
| CO                | $^1J_{\text{CO}}$ | M06L/aug-pc-2                | PBE0/aug-pcJ-2          | 11.85   | -6.70 | 14.33  | 0.10  | 19.59   |
| CO                | $^1J_{\text{CO}}$ | M06L/aug-pc-2                | M06L/aug-pcJ-2          | 3.96    | -6.59 | 13.74  | 0.10  | 11.21   |
| F <sub>2</sub> CO | $^1J_{\text{CO}}$ | CCSD(T)/aug-cc-pCVQZ         | B3LYP/pcJ-2             | 19.24   | -5.00 | 7.50   | -0.13 | 21.61   |
| F <sub>2</sub> CO | $^1J_{\text{CO}}$ | CCSD(T)/aug-cc-pCVQZ         | PBE0/pcJ-2              | 19.35   | -5.07 | 7.31   | -0.13 | 21.47   |
| F <sub>2</sub> CO | $^1J_{\text{CO}}$ | CCSD(T)/aug-cc-pCVQZ         | M06L/pcJ-2              | 2.90    | -4.32 | 6.48   | -0.14 | 4.93    |
| F <sub>2</sub> CO | $^1J_{\text{CO}}$ | B3LYP/pc-2                   | B3LYP/pcJ-2             | 20.00   | -5.12 | 7.32   | -0.13 | 22.08   |
| F <sub>2</sub> CO | $^1J_{\text{CO}}$ | B3LYP/pc-2                   | PBE0/pcJ-2              | 20.07   | -5.19 | 7.14   | -0.13 | 21.90   |
| F <sub>2</sub> CO | $^1J_{\text{CO}}$ | B3LYP/pc-2                   | M06L/pcJ-2              | 3.46    | -4.42 | 6.35   | -0.13 | 5.25    |
| F <sub>2</sub> CO | $^1J_{\text{CO}}$ | PBE0/pc-2                    | B3LYP/pcJ-2             | 18.13   | -4.96 | 7.49   | -0.13 | 20.53   |
| F <sub>2</sub> CO | $^1J_{\text{CO}}$ | PBE0/pc-2                    | PBE0/pcJ-2              | 18.27   | -5.03 | 7.30   | -0.13 | 20.42   |
| F <sub>2</sub> CO | $^1J_{\text{CO}}$ | PBE0/pc-2                    | M06L/pcJ-2              | 2.27    | -4.29 | 6.48   | -0.14 | 4.33    |
| F <sub>2</sub> CO | $^1J_{\text{CO}}$ | PBE0/aug-pc-2                | PBE0/aug-pcJ-2          | 17.95   | -5.02 | 7.30   | -0.13 | 20.10   |
| F <sub>2</sub> CO | $^1J_{\text{CO}}$ | PBE0/aug-pc-2                | M06L/aug-pcJ-2          | 2.18    | -4.28 | 6.48   | -0.14 | 4.24    |
| F <sub>2</sub> CO | $^1J_{\text{CO}}$ | M06L/pc-2                    | B3LYP/pcJ-2             | 19.26   | -5.01 | 7.43   | -0.13 | 21.56   |
| F <sub>2</sub> CO | $^1J_{\text{CO}}$ | M06L/pc-2                    | PBE0/pcJ-2              | 19.37   | -5.08 | 7.25   | -0.13 | 21.41   |
| F <sub>2</sub> CO | $^1J_{\text{CO}}$ | M06L/pc-2                    | M06L/pcJ-2              | 2.96    | -4.33 | 6.43   | -0.13 | 4.93    |
| F <sub>2</sub> CO | $^1J_{\text{CO}}$ | M06L/aug-pc-2                | PBE0/aug-pcJ-2          | 19.09   | -5.08 | 7.25   | -0.13 | 21.12   |
| F <sub>2</sub> CO | $^1J_{\text{CO}}$ | M06L/aug-pc-2                | M06L/aug-pcJ-2          | 2.90    | -4.32 | 6.42   | -0.13 | 4.86    |
| F <sub>2</sub> CO | $^1J_{\text{CF}}$ | CCSD(T)/aug-cc-pCVQZ         | B3LYP/pcJ-2             | -353.34 | -1.43 | -47.41 | 1.16  | -401.02 |
| F <sub>2</sub> CO | $^1J_{\text{CF}}$ | CCSD(T)/aug-cc-pCVQZ         | PBE0/pcJ-2              | -343.96 | -1.99 | -46.49 | 1.16  | -391.28 |
| F <sub>2</sub> CO | $^1J_{\text{CF}}$ | CCSD(T)/aug-cc-pCVQZ         | M06L/pcJ-2              | -241.24 | -1.08 | -41.72 | 1.17  | -282.88 |
| F <sub>2</sub> CO | $^1J_{\text{CF}}$ | B3LYP/pc-2                   | B3LYP/pcJ-2             | -364.18 | -1.24 | -47.00 | 1.15  | -411.28 |
| F <sub>2</sub> CO | $^1J_{\text{CF}}$ | B3LYP/pc-2                   | PBE0/pcJ-2              | -354.38 | -1.80 | -46.08 | 1.15  | -401.11 |
| F <sub>2</sub> CO | $^1J_{\text{CF}}$ | B3LYP/pc-2                   | M06L/pcJ-2              | -248.49 | -0.91 | -41.38 | 1.15  | -289.63 |
| F <sub>2</sub> CO | $^1J_{\text{CF}}$ | PBE0/pc-2                    | B3LYP/pcJ-2             | -350.85 | -1.38 | -47.20 | 1.17  | -398.25 |
| F <sub>2</sub> CO | $^1J_{\text{CF}}$ | PBE0/pc-2                    | PBE0/pcJ-2              | -341.55 | -1.93 | -46.28 | 1.17  | -388.59 |

Continued on next page

(Continued)

| Molecule          | Coupling                     | Geometry optimization method | SSCC calculation method | FC      | SD    | PSO     | DSO   | Total   |
|-------------------|------------------------------|------------------------------|-------------------------|---------|-------|---------|-------|---------|
| F <sub>2</sub> CO | <sup>1</sup> J <sub>CF</sub> | PBE0/pc-2                    | M06L/pcJ-2              | -239.38 | -1.04 | -41.57  | 1.17  | -280.82 |
| F <sub>2</sub> CO | <sup>1</sup> J <sub>CF</sub> | PBE0/aug-pc-2                | PBE0/aug-pcJ-2          | -339.95 | -1.90 | -46.49  | 1.17  | -387.17 |
| F <sub>2</sub> CO | <sup>1</sup> J <sub>CF</sub> | PBE0/aug-pc-2                | M06L/aug-pcJ-2          | -238.98 | -1.01 | -41.69  | 1.17  | -280.51 |
| F <sub>2</sub> CO | <sup>1</sup> J <sub>CF</sub> | M06L/pc-2                    | B3LYP/pcJ-2             | -354.13 | -1.36 | -47.35  | 1.16  | -401.68 |
| F <sub>2</sub> CO | <sup>1</sup> J <sub>CF</sub> | M06L/pc-2                    | PBE0/pcJ-2              | -344.71 | -1.91 | -46.43  | 1.16  | -391.89 |
| F <sub>2</sub> CO | <sup>1</sup> J <sub>CF</sub> | M06L/pc-2                    | M06L/pcJ-2              | -241.73 | -1.01 | -41.68  | 1.16  | -283.26 |
| F <sub>2</sub> CO | <sup>1</sup> J <sub>CF</sub> | M06L/aug-pc-2                | PBE0/aug-pcJ-2          | -343.33 | -1.88 | -46.63  | 1.16  | -390.67 |
| F <sub>2</sub> CO | <sup>1</sup> J <sub>CF</sub> | M06L/aug-pc-2                | M06L/aug-pcJ-2          | -241.48 | -0.98 | -41.80  | 1.16  | -283.09 |
| F <sub>2</sub> CO | <sup>2</sup> J <sub>OF</sub> | CCSD(T)/aug-cc-pCVQZ         | B3LYP/pcJ-2             | 6.97    | -6.81 | 53.84   | 0.32  | 54.33   |
| F <sub>2</sub> CO | <sup>2</sup> J <sub>OF</sub> | CCSD(T)/aug-cc-pCVQZ         | PBE0/pcJ-2              | 6.08    | -6.88 | 53.96   | 0.32  | 53.48   |
| F <sub>2</sub> CO | <sup>2</sup> J <sub>OF</sub> | CCSD(T)/aug-cc-pCVQZ         | M06L/pcJ-2              | -10.61  | -5.90 | 45.33   | 0.32  | 29.14   |
| F <sub>2</sub> CO | <sup>2</sup> J <sub>OF</sub> | B3LYP/pc-2                   | B3LYP/pcJ-2             | 7.38    | -6.74 | 54.64   | 0.32  | 55.60   |
| F <sub>2</sub> CO | <sup>2</sup> J <sub>OF</sub> | B3LYP/pc-2                   | PBE0/pcJ-2              | 6.49    | -6.82 | 54.75   | 0.32  | 54.74   |
| F <sub>2</sub> CO | <sup>2</sup> J <sub>OF</sub> | B3LYP/pc-2                   | M06L/pcJ-2              | -10.21  | -5.89 | 45.88   | 0.32  | 30.11   |
| F <sub>2</sub> CO | <sup>2</sup> J <sub>OF</sub> | PBE0/pc-2                    | B3LYP/pcJ-2             | 6.69    | -6.74 | 53.51   | 0.32  | 53.78   |
| F <sub>2</sub> CO | <sup>2</sup> J <sub>OF</sub> | PBE0/pc-2                    | PBE0/pcJ-2              | 5.81    | -6.81 | 53.63   | 0.32  | 52.96   |
| F <sub>2</sub> CO | <sup>2</sup> J <sub>OF</sub> | PBE0/pc-2                    | M06L/pcJ-2              | -10.77  | -5.85 | 45.07   | 0.33  | 28.78   |
| F <sub>2</sub> CO | <sup>2</sup> J <sub>OF</sub> | PBE0/aug-pc-2                | PBE0/aug-pcJ-2          | 5.74    | -6.78 | 53.52   | 0.32  | 52.81   |
| F <sub>2</sub> CO | <sup>2</sup> J <sub>OF</sub> | PBE0/aug-pc-2                | M06L/aug-pcJ-2          | -10.43  | -5.84 | 44.88   | 0.32  | 28.94   |
| F <sub>2</sub> CO | <sup>2</sup> J <sub>OF</sub> | M06L/pc-2                    | B3LYP/pcJ-2             | 7.16    | -6.76 | 53.75   | 0.32  | 54.48   |
| F <sub>2</sub> CO | <sup>2</sup> J <sub>OF</sub> | M06L/pc-2                    | PBE0/pcJ-2              | 6.27    | -6.83 | 53.86   | 0.32  | 53.63   |
| F <sub>2</sub> CO | <sup>2</sup> J <sub>OF</sub> | M06L/pc-2                    | M06L/pcJ-2              | -10.40  | -5.87 | 45.24   | 0.32  | 29.30   |
| F <sub>2</sub> CO | <sup>2</sup> J <sub>OF</sub> | M06L/aug-pc-2                | PBE0/aug-pcJ-2          | 6.22    | -6.80 | 53.78   | 0.32  | 53.52   |
| F <sub>2</sub> CO | <sup>2</sup> J <sub>OF</sub> | M06L/aug-pc-2                | M06L/aug-pcJ-2          | -10.04  | -5.86 | 45.06   | 0.32  | 29.48   |
| F <sub>2</sub> CO | <sup>2</sup> J <sub>FF</sub> | CCSD(T)/aug-cc-pCVQZ         | B3LYP/pcJ-2             | 49.02   | 26.94 | -312.20 | -1.10 | -237.35 |
| F <sub>2</sub> CO | <sup>2</sup> J <sub>FF</sub> | CCSD(T)/aug-cc-pCVQZ         | PBE0/pcJ-2              | 45.41   | 27.29 | -307.82 | -1.10 | -236.23 |
| F <sub>2</sub> CO | <sup>2</sup> J <sub>FF</sub> | CCSD(T)/aug-cc-pCVQZ         | M06L/pcJ-2              | 199.08  | 27.85 | -266.36 | -1.11 | -40.55  |
| F <sub>2</sub> CO | <sup>2</sup> J <sub>FF</sub> | B3LYP/pc-2                   | B3LYP/pcJ-2             | 34.17   | 28.70 | -316.57 | -1.06 | -254.77 |
| F <sub>2</sub> CO | <sup>2</sup> J <sub>FF</sub> | B3LYP/pc-2                   | PBE0/pcJ-2              | 30.89   | 29.09 | -311.89 | -1.07 | -252.97 |
| F <sub>2</sub> CO | <sup>2</sup> J <sub>FF</sub> | B3LYP/pc-2                   | M06L/pcJ-2              | 190.76  | 29.45 | -269.26 | -1.07 | -50.12  |
| F <sub>2</sub> CO | <sup>2</sup> J <sub>FF</sub> | PBE0/pc-2                    | B3LYP/pcJ-2             | 51.08   | 26.86 | -311.29 | -1.11 | -234.46 |
| F <sub>2</sub> CO | <sup>2</sup> J <sub>FF</sub> | PBE0/pc-2                    | PBE0/pcJ-2              | 47.42   | 27.21 | -306.93 | -1.11 | -233.41 |
| F <sub>2</sub> CO | <sup>2</sup> J <sub>FF</sub> | PBE0/pc-2                    | M06L/pcJ-2              | 200.93  | 27.77 | -265.59 | -1.12 | -38.01  |
| F <sub>2</sub> CO | <sup>2</sup> J <sub>FF</sub> | PBE0/aug-pc-2                | PBE0/aug-pcJ-2          | 49.97   | 27.41 | -308.25 | -1.11 | -231.98 |
| F <sub>2</sub> CO | <sup>2</sup> J <sub>FF</sub> | PBE0/aug-pc-2                | M06L/aug-pcJ-2          | 201.82  | 27.54 | -266.77 | -1.11 | -38.53  |
| F <sub>2</sub> CO | <sup>2</sup> J <sub>FF</sub> | M06L/pc-2                    | B3LYP/pcJ-2             | 51.81   | 27.06 | -314.57 | -1.08 | -236.79 |
| F <sub>2</sub> CO | <sup>2</sup> J <sub>FF</sub> | M06L/pc-2                    | PBE0/pcJ-2              | 48.19   | 27.40 | -310.14 | -1.09 | -235.63 |
| F <sub>2</sub> CO | <sup>2</sup> J <sub>FF</sub> | M06L/pc-2                    | M06L/pcJ-2              | 202.56  | 27.91 | -268.26 | -1.09 | -38.87  |
| F <sub>2</sub> CO | <sup>2</sup> J <sub>FF</sub> | M06L/aug-pc-2                | PBE0/aug-pcJ-2          | 50.50   | 27.64 | -311.56 | -1.08 | -234.51 |
| F <sub>2</sub> CO | <sup>2</sup> J <sub>FF</sub> | M06L/aug-pc-2                | M06L/aug-pcJ-2          | 203.32  | 27.72 | -269.53 | -1.09 | -39.58  |
| FCCF              | <sup>1</sup> J <sub>CC</sub> | CCSD(T)/aug-cc-pCVQZ         | B3LYP/pcJ-2             | 406.70  | 14.40 | 17.36   | 0.31  | 438.77  |
| FCCF              | <sup>1</sup> J <sub>CC</sub> | CCSD(T)/aug-cc-pCVQZ         | PBE0/pcJ-2              | 395.96  | 14.69 | 16.98   | 0.31  | 427.93  |
| FCCF              | <sup>1</sup> J <sub>CC</sub> | CCSD(T)/aug-cc-pCVQZ         | M06L/pcJ-2              | 410.69  | 12.83 | 14.04   | 0.32  | 437.87  |
| FCCF              | <sup>1</sup> J <sub>CC</sub> | B3LYP/pc-2                   | B3LYP/pcJ-2             | 406.45  | 14.29 | 17.30   | 0.31  | 438.34  |
| FCCF              | <sup>1</sup> J <sub>CC</sub> | B3LYP/pc-2                   | PBE0/pcJ-2              | 395.69  | 14.57 | 16.91   | 0.31  | 427.48  |
| FCCF              | <sup>1</sup> J <sub>CC</sub> | B3LYP/pc-2                   | M06L/pcJ-2              | 409.64  | 12.74 | 14.02   | 0.32  | 436.71  |
| FCCF              | <sup>1</sup> J <sub>CC</sub> | PBE0/pc-2                    | B3LYP/pcJ-2             | 404.89  | 14.15 | 17.06   | 0.31  | 436.41  |
| FCCF              | <sup>1</sup> J <sub>CC</sub> | PBE0/pc-2                    | PBE0/pcJ-2              | 394.14  | 14.43 | 16.69   | 0.32  | 425.57  |
| FCCF              | <sup>1</sup> J <sub>CC</sub> | PBE0/pc-2                    | M06L/pcJ-2              | 407.87  | 12.61 | 13.82   | 0.32  | 434.63  |

Continued on next page

(Continued)

| Molecule | Coupling   | Geometry optimization method | SSCC calculation method | FC      | SD     | PSO    | DSO   | Total   |
|----------|------------|------------------------------|-------------------------|---------|--------|--------|-------|---------|
| FCCF     | $^1J_{CC}$ | PBE0/aug-pc-2                | PBE0/aug-pcJ-2          | 394.80  | 14.46  | 16.73  | 0.32  | 426.30  |
| FCCF     | $^1J_{CC}$ | PBE0/aug-pc-2                | M06L/aug-pcJ-2          | 408.14  | 12.55  | 13.80  | 0.32  | 434.81  |
| FCCF     | $^1J_{CC}$ | M06L/pc-2                    | B3LYP/pcJ-2             | 404.63  | 14.13  | 17.02  | 0.31  | 436.10  |
| FCCF     | $^1J_{CC}$ | M06L/pc-2                    | PBE0/pcJ-2              | 393.88  | 14.42  | 16.65  | 0.32  | 425.27  |
| FCCF     | $^1J_{CC}$ | M06L/pc-2                    | M06L/pcJ-2              | 407.64  | 12.59  | 13.79  | 0.32  | 434.34  |
| FCCF     | $^1J_{CC}$ | M06L/aug-pc-2                | PBE0/aug-pcJ-2          | 394.60  | 14.45  | 16.70  | 0.32  | 426.07  |
| FCCF     | $^1J_{CC}$ | M06L/aug-pc-2                | M06L/aug-pcJ-2          | 407.99  | 12.54  | 13.78  | 0.32  | 434.63  |
| FCCF     | $^1J_{CF}$ | CCSD(T)/aug-cc-pCVQZ         | B3LYP/pcJ-2             | -355.00 | -13.93 | -17.88 | 0.58  | -386.24 |
| FCCF     | $^1J_{CF}$ | CCSD(T)/aug-cc-pCVQZ         | PBE0/pcJ-2              | -352.88 | -16.01 | -19.04 | 0.58  | -387.35 |
| FCCF     | $^1J_{CF}$ | CCSD(T)/aug-cc-pCVQZ         | M06L/pcJ-2              | -179.63 | -11.39 | -12.38 | 0.59  | -202.80 |
| FCCF     | $^1J_{CF}$ | B3LYP/pc-2                   | B3LYP/pcJ-2             | -353.99 | -13.37 | -17.07 | 0.58  | -383.84 |
| FCCF     | $^1J_{CF}$ | B3LYP/pc-2                   | PBE0/pcJ-2              | -351.82 | -15.42 | -18.23 | 0.58  | -384.89 |
| FCCF     | $^1J_{CF}$ | B3LYP/pc-2                   | M06L/pcJ-2              | -178.62 | -10.92 | -11.82 | 0.59  | -200.77 |
| FCCF     | $^1J_{CF}$ | PBE0/pc-2                    | B3LYP/pcJ-2             | -342.33 | -13.94 | -18.52 | 0.58  | -374.21 |
| FCCF     | $^1J_{CF}$ | PBE0/pc-2                    | PBE0/pcJ-2              | -340.38 | -15.98 | -19.64 | 0.58  | -375.42 |
| FCCF     | $^1J_{CF}$ | PBE0/pc-2                    | M06L/pcJ-2              | -172.01 | -11.39 | -12.94 | 0.59  | -195.75 |
| FCCF     | $^1J_{CF}$ | PBE0/aug-pc-2                | PBE0/aug-pcJ-2          | -338.99 | -15.88 | -19.77 | 0.58  | -374.06 |
| FCCF     | $^1J_{CF}$ | PBE0/aug-pc-2                | M06L/aug-pcJ-2          | -171.64 | -11.26 | -12.99 | 0.59  | -195.29 |
| FCCF     | $^1J_{CF}$ | M06L/pc-2                    | B3LYP/pcJ-2             | -340.33 | -14.09 | -18.84 | 0.58  | -372.68 |
| FCCF     | $^1J_{CF}$ | M06L/pc-2                    | PBE0/pcJ-2              | -338.42 | -16.12 | -19.95 | 0.58  | -373.92 |
| FCCF     | $^1J_{CF}$ | M06L/pc-2                    | M06L/pcJ-2              | -170.90 | -11.51 | -13.18 | 0.59  | -194.99 |
| FCCF     | $^1J_{CF}$ | M06L/aug-pc-2                | PBE0/aug-pcJ-2          | -337.43 | -16.02 | -20.06 | 0.58  | -372.93 |
| FCCF     | $^1J_{CF}$ | M06L/aug-pc-2                | M06L/aug-pcJ-2          | -170.77 | -11.37 | -13.21 | 0.59  | -194.76 |
| FCCF     | $^2J_{CF}$ | CCSD(T)/aug-cc-pCVQZ         | B3LYP/pcJ-2             | 6.14    | 29.05  | 13.18  | -0.69 | 47.68   |
| FCCF     | $^2J_{CF}$ | CCSD(T)/aug-cc-pCVQZ         | PBE0/pcJ-2              | 8.70    | 29.51  | 12.54  | -0.69 | 50.05   |
| FCCF     | $^2J_{CF}$ | CCSD(T)/aug-cc-pCVQZ         | M06L/pcJ-2              | 56.35   | 24.83  | 9.16   | -0.69 | 89.65   |
| FCCF     | $^2J_{CF}$ | B3LYP/pc-2                   | B3LYP/pcJ-2             | 5.73    | 28.65  | 12.73  | -0.70 | 46.40   |
| FCCF     | $^2J_{CF}$ | B3LYP/pc-2                   | PBE0/pcJ-2              | 8.22    | 29.09  | 12.10  | -0.70 | 48.71   |
| FCCF     | $^2J_{CF}$ | B3LYP/pc-2                   | M06L/pcJ-2              | 55.75   | 24.53  | 8.86   | -0.70 | 88.44   |
| FCCF     | $^2J_{CF}$ | PBE0/pc-2                    | B3LYP/pcJ-2             | 7.94    | 28.98  | 13.52  | -0.70 | 49.74   |
| FCCF     | $^2J_{CF}$ | PBE0/pc-2                    | PBE0/pcJ-2              | 10.40   | 29.41  | 12.88  | -0.70 | 51.99   |
| FCCF     | $^2J_{CF}$ | PBE0/pc-2                    | M06L/pcJ-2              | 56.92   | 24.75  | 9.40   | -0.70 | 90.36   |
| FCCF     | $^2J_{CF}$ | PBE0/aug-pc-2                | PBE0/aug-pcJ-2          | 10.63   | 29.20  | 12.69  | -0.70 | 51.82   |
| FCCF     | $^2J_{CF}$ | PBE0/aug-pc-2                | M06L/aug-pcJ-2          | 56.16   | 24.57  | 9.32   | -0.70 | 89.35   |
| FCCF     | $^2J_{CF}$ | M06L/pc-2                    | B3LYP/pcJ-2             | 8.37    | 29.07  | 13.70  | -0.70 | 50.43   |
| FCCF     | $^2J_{CF}$ | M06L/pc-2                    | PBE0/pcJ-2              | 10.82   | 29.50  | 13.06  | -0.70 | 52.67   |
| FCCF     | $^2J_{CF}$ | M06L/pc-2                    | M06L/pcJ-2              | 57.18   | 24.81  | 9.52   | -0.70 | 90.80   |
| FCCF     | $^2J_{CF}$ | M06L/aug-pc-2                | PBE0/aug-pcJ-2          | 10.99   | 29.29  | 12.85  | -0.70 | 52.43   |
| FCCF     | $^2J_{CF}$ | M06L/aug-pc-2                | M06L/aug-pcJ-2          | 56.39   | 24.64  | 9.43   | -0.70 | 89.75   |
| FCCF     | $^2J_{CF}$ | CCSD(T)/aug-cc-pCVQZ         | B3LYP/pcJ-2             | 4.21    | 52.95  | -24.74 | -0.19 | 30.58   |
| FCCF     | $^2J_{CF}$ | CCSD(T)/aug-cc-pCVQZ         | PBE0/pcJ-2              | 6.86    | 52.12  | -32.67 | -1.85 | 24.46   |
| FCCF     | $^2J_{CF}$ | CCSD(T)/aug-cc-pCVQZ         | M06L/pcJ-2              | 10.86   | 33.95  | -46.23 | -1.86 | -3.28   |
| FCCF     | $^2J_{CF}$ | B3LYP/pc-2                   | B3LYP/pcJ-2             | 4.11    | 52.23  | -24.23 | -1.85 | 30.26   |
| FCCF     | $^2J_{CF}$ | B3LYP/pc-2                   | PBE0/pcJ-2              | 6.70    | 51.37  | -32.15 | -1.85 | 24.07   |
| FCCF     | $^2J_{CF}$ | B3LYP/pc-2                   | M06L/pcJ-2              | 10.60   | 33.59  | -45.51 | -1.86 | -3.18   |
| FCCF     | $^2J_{CF}$ | PBE0/pc-2                    | B3LYP/pcJ-2             | 3.96    | 55.45  | -16.64 | -1.88 | 40.89   |
| FCCF     | $^2J_{CF}$ | PBE0/pc-2                    | PBE0/pcJ-2              | 6.49    | 54.56  | -24.64 | -1.88 | 34.53   |
| FCCF     | $^2J_{CF}$ | PBE0/pc-2                    | M06L/pcJ-2              | 10.81   | 36.36  | -39.47 | -1.89 | 5.81    |
| FCCF     | $^2J_{CF}$ | PBE0/aug-pc-2                | PBE0/aug-pcJ-2          | 5.97    | 52.63  | -27.03 | -1.88 | 29.69   |

Continued on next page

(Continued)

| Molecule | Coupling   | Geometry optimization method | SSCC calculation method | FC      | SD     | PSO    | DSO   | Total   |
|----------|------------|------------------------------|-------------------------|---------|--------|--------|-------|---------|
| FCCF     | $^2J_{CF}$ | PBE0/aug-pc-2                | M06L/aug-pcJ-2          | 9.95    | 35.69  | -39.81 | -1.89 | 3.95    |
| FCCF     | $^2J_{CF}$ | M06L/pc-2                    | B3LYP/pcJ-2             | 3.95    | 56.08  | -15.34 | -1.89 | 42.80   |
| FCCF     | $^2J_{CF}$ | M06L/pc-2                    | PBE0/pcJ-2              | 6.47    | 55.19  | -23.35 | -1.89 | 36.41   |
| FCCF     | $^2J_{CF}$ | M06L/pc-2                    | M06L/pcJ-2              | 10.87   | 36.88  | -38.47 | -1.89 | 7.39    |
| FCCF     | $^2J_{CF}$ | M06L/aug-pc-2                | PBE0/aug-pcJ-2          | 5.96    | 53.16  | -26.02 | -1.89 | 31.22   |
| FCCF     | $^2J_{CF}$ | M06L/aug-pc-2                | M06L/aug-pcJ-2          | 10.01   | 36.13  | -39.01 | -1.89 | 5.24    |
| FCCH     | $^1J_{CC}$ | CCSD(T)/aug-cc-pCVQZ         | B3LYP/pcJ-2             | 265.48  | 13.57  | 13.50  | 0.16  | 292.71  |
| FCCH     | $^1J_{CC}$ | CCSD(T)/aug-cc-pCVQZ         | PBE0/pcJ-2              | 256.34  | 14.01  | 13.29  | 0.16  | 283.80  |
| FCCH     | $^1J_{CC}$ | CCSD(T)/aug-cc-pCVQZ         | M06L/pcJ-2              | 275.39  | 12.97  | 10.88  | 0.17  | 299.41  |
| FCCH     | $^1J_{CC}$ | B3LYP/pc-2                   | B3LYP/pcJ-2             | 265.95  | 13.35  | 13.35  | 0.16  | 292.80  |
| FCCH     | $^1J_{CC}$ | B3LYP/pc-2                   | PBE0/pcJ-2              | 256.78  | 13.78  | 13.13  | 0.16  | 283.85  |
| FCCH     | $^1J_{CC}$ | B3LYP/pc-2                   | M06L/pcJ-2              | 274.73  | 12.78  | 10.79  | 0.17  | 298.47  |
| FCCH     | $^1J_{CC}$ | PBE0/pc-2                    | B3LYP/pcJ-2             | 265.46  | 13.26  | 13.20  | 0.16  | 292.09  |
| FCCH     | $^1J_{CC}$ | PBE0/pc-2                    | PBE0/pcJ-2              | 256.30  | 13.68  | 12.99  | 0.17  | 292.08  |
| FCCH     | $^1J_{CC}$ | PBE0/pc-2                    | M06L/pcJ-2              | 274.09  | 12.68  | 10.66  | 0.18  | 297.62  |
| FCCH     | $^1J_{CC}$ | PBE0/aug-pc-2                | PBE0/aug-pcJ-2          | 256.55  | 13.71  | 13.01  | 0.17  | 283.45  |
| FCCH     | $^1J_{CC}$ | PBE0/aug-pc-2                | M06L/aug-pcJ-2          | 273.72  | 12.60  | 10.62  | 0.17  | 297.11  |
| FCCH     | $^1J_{CC}$ | M06L/pc-2                    | B3LYP/pcJ-2             | 265.12  | 13.24  | 13.14  | 0.16  | 291.67  |
| FCCH     | $^1J_{CC}$ | M06L/pc-2                    | PBE0/pcJ-2              | 255.96  | 13.67  | 12.93  | 0.17  | 282.72  |
| FCCH     | $^1J_{CC}$ | M06L/pc-2                    | M06L/pcJ-2              | 273.78  | 12.66  | 10.61  | 0.18  | 297.23  |
| FCCH     | $^1J_{CC}$ | M06L/aug-pc-2                | PBE0/aug-pcJ-2          | 256.22  | 13.70  | 12.96  | 0.17  | 283.05  |
| FCCH     | $^1J_{CC}$ | M06L/aug-pc-2                | M06L/aug-pcJ-2          | 273.43  | 12.57  | 10.57  | 0.18  | 296.75  |
| FCCH     | $^1J_{CF}$ | CCSD(T)/aug-cc-pCVQZ         | B3LYP/pcJ-2             | -352.85 | -17.37 | -32.88 | 0.48  | -402.62 |
| FCCH     | $^1J_{CF}$ | CCSD(T)/aug-cc-pCVQZ         | PBE0/pcJ-2              | -350.14 | -19.81 | -34.06 | 0.47  | -403.54 |
| FCCH     | $^1J_{CF}$ | CCSD(T)/aug-cc-pCVQZ         | M06L/pcJ-2              | -210.40 | -15.77 | -25.63 | 0.48  | -251.32 |
| FCCH     | $^1J_{CF}$ | B3LYP/pc-2                   | B3LYP/pcJ-2             | -349.04 | -16.65 | -31.96 | 0.48  | -397.17 |
| FCCH     | $^1J_{CF}$ | B3LYP/pc-2                   | PBE0/pcJ-2              | -346.31 | -19.03 | -33.13 | 0.48  | -397.99 |
| FCCH     | $^1J_{CF}$ | B3LYP/pc-2                   | M06L/pcJ-2              | -207.21 | -15.14 | -25.02 | 0.49  | -246.88 |
| FCCH     | $^1J_{CF}$ | PBE0/pc-2                    | B3LYP/pcJ-2             | -338.45 | -17.36 | -33.74 | 0.48  | -389.07 |
| FCCH     | $^1J_{CF}$ | PBE0/pc-2                    | PBE0/pcJ-2              | -336.01 | -19.73 | -34.85 | 0.48  | -390.11 |
| FCCH     | $^1J_{CF}$ | PBE0/pc-2                    | M06L/pcJ-2              | -201.03 | -15.74 | -26.37 | 0.48  | -242.66 |
| FCCH     | $^1J_{CF}$ | PBE0/aug-pc-2                | PBE0/aug-pcJ-2          | -335.19 | -19.59 | -34.75 | 0.48  | -389.05 |
| FCCH     | $^1J_{CF}$ | PBE0/aug-pc-2                | M06L/aug-pcJ-2          | -201.11 | -15.48 | -26.39 | 0.48  | -242.49 |
| FCCH     | $^1J_{CF}$ | M06L/pc-2                    | B3LYP/pcJ-2             | -335.19 | -17.62 | -34.36 | 0.48  | -386.69 |
| FCCH     | $^1J_{CF}$ | M06L/pc-2                    | PBE0/pcJ-2              | -332.84 | -20.00 | -35.46 | 0.48  | -387.81 |
| FCCH     | $^1J_{CF}$ | M06L/pc-2                    | M06L/pcJ-2              | -199.12 | -15.96 | -26.84 | 0.48  | -241.43 |
| FCCH     | $^1J_{CF}$ | M06L/aug-pc-2                | PBE0/aug-pcJ-2          | -332.18 | -19.84 | -35.33 | 0.48  | -386.88 |
| FCCH     | $^1J_{CF}$ | M06L/aug-pc-2                | M06L/aug-pcJ-2          | -199.31 | -15.68 | -26.83 | 0.48  | -241.34 |
| FCCH     | $^2J_{CF}$ | CCSD(T)/aug-cc-pCVQZ         | B3LYP/pcJ-2             | 2.29    | 27.25  | -0.07  | -0.88 | 28.58   |
| FCCH     | $^2J_{CF}$ | CCSD(T)/aug-cc-pCVQZ         | PBE0/pcJ-2              | 4.38    | 28.02  | -0.66  | -0.88 | 30.85   |
| FCCH     | $^2J_{CF}$ | CCSD(T)/aug-cc-pCVQZ         | M06L/pcJ-2              | 42.90   | 25.02  | -3.37  | -0.88 | 63.67   |
| FCCH     | $^2J_{CF}$ | B3LYP/pc-2                   | B3LYP/pcJ-2             | 2.22    | 26.74  | -0.32  | -0.89 | 27.75   |
| FCCH     | $^2J_{CF}$ | B3LYP/pc-2                   | PBE0/pcJ-2              | 4.22    | 27.47  | -0.91  | -0.89 | 29.89   |
| FCCH     | $^2J_{CF}$ | B3LYP/pc-2                   | M06L/pcJ-2              | 42.47   | 24.56  | -3.48  | -0.89 | 62.67   |
| FCCH     | $^2J_{CF}$ | PBE0/pc-2                    | B3LYP/pcJ-2             | 3.78    | 27.29  | 1.02   | -0.90 | 31.18   |
| FCCH     | $^2J_{CF}$ | PBE0/pc-2                    | PBE0/pcJ-2              | 5.77    | 28.01  | 0.41   | -0.90 | 33.28   |
| FCCH     | $^2J_{CF}$ | PBE0/pc-2                    | M06L/pcJ-2              | 43.44   | 25.03  | -2.45  | -0.90 | 65.12   |
| FCCH     | $^2J_{CF}$ | PBE0/aug-pc-2                | PBE0/aug-pcJ-2          | 5.78    | 27.83  | 0.27   | -0.90 | 32.98   |
| FCCH     | $^2J_{CF}$ | PBE0/aug-pc-2                | M06L/aug-pcJ-2          | 42.48   | 24.80  | -2.52  | -0.90 | 63.86   |

Continued on next page

(Continued)

| Molecule | Coupling   | Geometry optimization method | SSCC calculation method | FC     | SD    | PSO   | DSO   | Total  |
|----------|------------|------------------------------|-------------------------|--------|-------|-------|-------|--------|
| FCCH     | $^2J_{CF}$ | M06L/pc-2                    | B3LYP/pcJ-2             | 4.37   | 27.47 | 1.38  | -0.91 | 32.32  |
| FCCH     | $^2J_{CF}$ | M06L/pc-2                    | PBE0/pcJ-2              | 6.35   | 28.20 | 0.77  | -0.90 | 34.41  |
| FCCH     | $^2J_{CF}$ | M06L/pc-2                    | M06L/pcJ-2              | 43.87  | 25.18 | -2.19 | -0.90 | 65.96  |
| FCCH     | $^2J_{CF}$ | M06L/aug-pc-2                | PBE0/aug-pcJ-2          | 6.34   | 28.01 | 0.61  | -0.90 | 34.06  |
| FCCH     | $^2J_{CF}$ | M06L/aug-pc-2                | M06L/aug-pcJ-2          | 42.90  | 24.95 | -2.28 | -0.90 | 64.66  |
| FCCH     | $^1J_{CH}$ | CCSD(T)/aug-cc-pCVQZ         | B3LYP/pcJ-2             | 304.12 | 0.56  | -0.89 | 0.42  | 304.22 |
| FCCH     | $^1J_{CH}$ | CCSD(T)/aug-cc-pCVQZ         | PBE0/pcJ-2              | 287.84 | 0.48  | -1.05 | 0.44  | 287.71 |
| FCCH     | $^1J_{CH}$ | CCSD(T)/aug-cc-pCVQZ         | M06L/pcJ-2              | 353.16 | 0.33  | -0.35 | 0.46  | 353.60 |
| FCCH     | $^1J_{CH}$ | B3LYP/pc-2                   | B3LYP/pcJ-2             | 301.75 | 0.56  | -0.83 | 0.43  | 301.91 |
| FCCH     | $^1J_{CH}$ | B3LYP/pc-2                   | PBE0/pcJ-2              | 285.55 | 0.48  | -0.99 | 0.45  | 285.49 |
| FCCH     | $^1J_{CH}$ | B3LYP/pc-2                   | M06L/pcJ-2              | 350.60 | 0.34  | -0.31 | 0.47  | 351.11 |
| FCCH     | $^1J_{CH}$ | PBE0/pc-2                    | B3LYP/pcJ-2             | 302.07 | 0.56  | -0.81 | 0.43  | 302.26 |
| FCCH     | $^1J_{CH}$ | PBE0/pc-2                    | PBE0/pcJ-2              | 285.81 | 0.48  | -0.97 | 0.45  | 285.77 |
| FCCH     | $^1J_{CH}$ | PBE0/pc-2                    | M06L/pcJ-2              | 350.55 | 0.35  | -0.29 | 0.47  | 351.08 |
| FCCH     | $^1J_{CH}$ | PBE0/aug-pc-2                | PBE0/aug-pcJ-2          | 285.82 | 0.46  | -0.98 | 0.45  | 285.74 |
| FCCH     | $^1J_{CH}$ | PBE0/aug-pc-2                | M06L/aug-pcJ-2          | 350.30 | 0.35  | -0.30 | 0.47  | 350.82 |
| FCCH     | $^1J_{CH}$ | M06L/pc-2                    | B3LYP/pcJ-2             | 301.00 | 0.56  | -0.84 | 0.44  | 301.16 |
| FCCH     | $^1J_{CH}$ | M06L/pc-2                    | PBE0/pcJ-2              | 284.87 | 0.48  | -1.00 | 0.45  | 284.80 |
| FCCH     | $^1J_{CH}$ | M06L/pc-2                    | M06L/pcJ-2              | 349.62 | 0.34  | -0.32 | 0.47  | 350.12 |
| FCCH     | $^1J_{CH}$ | M06L/aug-pc-2                | PBE0/aug-pcJ-2          | 284.92 | 0.46  | -1.02 | 0.45  | 284.81 |
| FCCH     | $^1J_{CH}$ | M06L/aug-pc-2                | M06L/aug-pcJ-2          | 349.43 | 0.34  | -0.33 | 0.47  | 349.91 |
| FCCH     | $^2J_{CH}$ | CCSD(T)/aug-cc-pCVQZ         | B3LYP/pcJ-2             | 67.66  | 1.19  | 6.26  | -1.13 | 73.98  |
| FCCH     | $^2J_{CH}$ | CCSD(T)/aug-cc-pCVQZ         | PBE0/pcJ-2              | 64.48  | 1.26  | 6.25  | -1.12 | 70.87  |
| FCCH     | $^2J_{CH}$ | CCSD(T)/aug-cc-pCVQZ         | M06L/pcJ-2              | 65.39  | 1.29  | 5.52  | -1.12 | 71.09  |
| FCCH     | $^2J_{CH}$ | B3LYP/pc-2                   | B3LYP/pcJ-2             | 67.45  | 1.18  | 6.22  | -1.14 | 73.71  |
| FCCH     | $^2J_{CH}$ | B3LYP/pc-2                   | PBE0/pcJ-2              | 64.36  | 1.25  | 6.21  | -1.13 | 70.68  |
| FCCH     | $^2J_{CH}$ | B3LYP/pc-2                   | M06L/pcJ-2              | 65.31  | 1.28  | 5.50  | -1.13 | 70.96  |
| FCCH     | $^2J_{CH}$ | PBE0/pc-2                    | B3LYP/pcJ-2             | 67.39  | 1.17  | 6.17  | -1.13 | 73.60  |
| FCCH     | $^2J_{CH}$ | PBE0/pc-2                    | PBE0/pcJ-2              | 64.32  | 1.24  | 6.16  | -1.12 | 70.60  |
| FCCH     | $^2J_{CH}$ | PBE0/pc-2                    | M06L/pcJ-2              | 65.27  | 1.27  | 5.46  | -1.12 | 70.88  |
| FCCH     | $^2J_{CH}$ | PBE0/aug-pc-2                | PBE0/aug-pcJ-2          | 64.33  | 1.27  | 6.18  | -1.12 | 70.66  |
| FCCH     | $^2J_{CH}$ | PBE0/aug-pc-2                | M06L/aug-pcJ-2          | 65.36  | 1.27  | 5.47  | -1.12 | 70.97  |
| FCCH     | $^2J_{CH}$ | M06L/pc-2                    | B3LYP/pcJ-2             | 67.15  | 1.20  | 6.23  | -1.14 | 73.44  |
| FCCH     | $^2J_{CH}$ | M06L/pc-2                    | PBE0/pcJ-2              | 64.11  | 1.27  | 6.22  | -1.13 | 70.47  |
| FCCH     | $^2J_{CH}$ | M06L/pc-2                    | M06L/pcJ-2              | 65.02  | 1.29  | 5.50  | -1.13 | 70.69  |
| FCCH     | $^2J_{CH}$ | M06L/aug-pc-2                | PBE0/aug-pcJ-2          | 64.12  | 1.30  | 6.24  | -1.13 | 70.52  |
| FCCH     | $^2J_{CH}$ | M06L/aug-pc-2                | M06L/aug-pcJ-2          | 65.12  | 1.29  | 5.51  | -1.13 | 70.80  |
| FCCH     | $^3J_{FH}$ | CCSD(T)/aug-cc-pCVQZ         | B3LYP/pcJ-2             | 0.43   | 4.08  | 16.76 | -2.62 | 18.64  |
| FCCH     | $^3J_{FH}$ | CCSD(T)/aug-cc-pCVQZ         | PBE0/pcJ-2              | -1.60  | 4.23  | 16.67 | -2.62 | 16.68  |
| FCCH     | $^3J_{FH}$ | CCSD(T)/aug-cc-pCVQZ         | M06L/pcJ-2              | 1.98   | 4.32  | 14.38 | -2.62 | 18.06  |
| FCCH     | $^3J_{FH}$ | B3LYP/pc-2                   | B3LYP/pcJ-2             | 0.44   | 4.03  | 16.61 | -2.63 | 18.45  |
| FCCH     | $^3J_{FH}$ | B3LYP/pc-2                   | PBE0/pcJ-2              | -1.52  | 4.17  | 16.52 | -2.63 | 16.55  |
| FCCH     | $^3J_{FH}$ | B3LYP/pc-2                   | M06L/pcJ-2              | 1.96   | 4.27  | 14.28 | -2.64 | 17.87  |
| FCCH     | $^3J_{FH}$ | PBE0/pc-2                    | B3LYP/pcJ-2             | 0.66   | 4.04  | 16.80 | -2.65 | 18.84  |
| FCCH     | $^3J_{FH}$ | PBE0/pc-2                    | PBE0/pcJ-2              | -1.28  | 4.19  | 16.71 | -2.65 | 16.97  |
| FCCH     | $^3J_{FH}$ | PBE0/pc-2                    | M06L/pcJ-2              | 1.94   | 4.28  | 14.43 | -2.65 | 18.00  |
| FCCH     | $^3J_{FH}$ | PBE0/aug-pc-2                | PBE0/aug-pcJ-2          | -1.18  | 4.19  | 16.57 | -2.65 | 16.94  |
| FCCH     | $^3J_{FH}$ | PBE0/aug-pc-2                | M06L/aug-pcJ-2          | 2.38   | 4.23  | 14.37 | -2.65 | 18.33  |
| FCCH     | $^3J_{FH}$ | M06L/pc-2                    | B3LYP/pcJ-2             | 0.72   | 4.12  | 17.06 | -2.67 | 19.24  |

Continued on next page

(Continued)

| Molecule | Coupling   | Geometry optimization method | SSCC calculation method | FC      | SD     | PSO    | DSO   | Total   |
|----------|------------|------------------------------|-------------------------|---------|--------|--------|-------|---------|
| FCCH     | $^3J_{FH}$ | M06L/pc-2                    | PBE0/pcJ-2              | -1.21   | 4.28   | 16.97  | -2.67 | 17.38   |
| FCCH     | $^3J_{FH}$ | M06L/pc-2                    | M06L/pcJ-2              | 1.89    | 4.37   | 14.65  | -2.67 | 18.24   |
| FCCH     | $^3J_{FH}$ | M06L/aug-pc-2                | PBE0/aug-pcJ-2          | -1.11   | 4.28   | 16.82  | -2.66 | 17.33   |
| FCCH     | $^3J_{FH}$ | M06L/aug-pc-2                | M06L/aug-pcJ-2          | 2.32    | 4.31   | 14.58  | -2.67 | 18.55   |
| FCN      | $^1J_{CN}$ | CCSD(T)/aug-cc-pCVQZ         | B3LYP/pcJ-2             | 13.87   | -8.11  | -5.77  | -0.03 | -0.05   |
| FCN      | $^1J_{CN}$ | CCSD(T)/aug-cc-pCVQZ         | PBE0/pcJ-2              | 14.86   | -8.34  | -5.74  | -0.03 | 0.75    |
| FCN      | $^1J_{CN}$ | CCSD(T)/aug-cc-pCVQZ         | M06L/pcJ-2              | 1.05    | -7.34  | -4.42  | -0.04 | -10.75  |
| FCN      | $^1J_{CN}$ | B3LYP/pc-2                   | B3LYP/pcJ-2             | 11.79   | -7.93  | -5.63  | -0.03 | -1.81   |
| FCN      | $^1J_{CN}$ | B3LYP/pc-2                   | PBE0/pcJ-2              | 12.80   | -8.15  | -5.60  | -0.03 | -0.98   |
| FCN      | $^1J_{CN}$ | B3LYP/pc-2                   | M06L/pcJ-2              | 0.17    | -7.21  | -4.33  | -0.04 | -11.41  |
| FCN      | $^1J_{CN}$ | PBE0/pc-2                    | B3LYP/pcJ-2             | 10.61   | -7.85  | -5.49  | -0.03 | -2.77   |
| FCN      | $^1J_{CN}$ | PBE0/pc-2                    | PBE0/pcJ-2              | 11.66   | -8.06  | -5.47  | -0.03 | -1.90   |
| FCN      | $^1J_{CN}$ | PBE0/pc-2                    | M06L/pcJ-2              | -0.64   | -7.14  | -4.22  | -0.04 | -12.03  |
| FCN      | $^1J_{CN}$ | PBE0/aug-pc-2                | PBE0/aug-pcJ-2          | 11.12   | -8.08  | -5.48  | -0.03 | -2.47   |
| FCN      | $^1J_{CN}$ | PBE0/aug-pc-2                | M06L/aug-pcJ-2          | -0.81   | -7.13  | -4.22  | -0.04 | -12.20  |
| FCN      | $^1J_{CN}$ | M06L/pc-2                    | B3LYP/pcJ-2             | 12.10   | -7.98  | -5.59  | -0.03 | -1.50   |
| FCN      | $^1J_{CN}$ | M06L/pc-2                    | PBE0/pcJ-2              | 13.14   | -8.20  | -5.56  | -0.04 | -0.65   |
| FCN      | $^1J_{CN}$ | M06L/pc-2                    | M06L/pcJ-2              | -0.04   | -7.22  | -4.27  | -0.04 | -11.57  |
| FCN      | $^1J_{CN}$ | M06L/aug-pc-2                | PBE0/aug-pcJ-2          | 12.64   | -8.22  | -5.58  | -0.04 | -1.19   |
| FCN      | $^1J_{CN}$ | M06L/aug-pc-2                | M06L/aug-pcJ-2          | -0.17   | -7.22  | -4.28  | -0.04 | -11.71  |
| FCN      | $^1J_{CF}$ | CCSD(T)/aug-cc-pCVQZ         | B3LYP/pcJ-2             | -490.82 | -16.87 | -39.79 | 0.55  | -546.94 |
| FCN      | $^1J_{CF}$ | CCSD(T)/aug-cc-pCVQZ         | PBE0/pcJ-2              | -481.59 | -18.82 | -41.03 | 0.55  | -540.88 |
| FCN      | $^1J_{CF}$ | CCSD(T)/aug-cc-pCVQZ         | M06L/pcJ-2              | -366.33 | -13.40 | -31.98 | 0.56  | -411.16 |
| FCN      | $^1J_{CF}$ | B3LYP/pc-2                   | B3LYP/pcJ-2             | -484.85 | -16.00 | -38.26 | 0.56  | -538.55 |
| FCN      | $^1J_{CF}$ | B3LYP/pc-2                   | PBE0/pcJ-2              | -475.73 | -17.89 | -39.50 | 0.56  | -532.56 |
| FCN      | $^1J_{CF}$ | B3LYP/pc-2                   | M06L/pcJ-2              | -360.25 | -12.77 | -30.93 | 0.57  | -403.38 |
| FCN      | $^1J_{CF}$ | PBE0/pc-2                    | B3LYP/pcJ-2             | -471.12 | -16.44 | -39.37 | 0.56  | -526.37 |
| FCN      | $^1J_{CF}$ | PBE0/pc-2                    | PBE0/pcJ-2              | -462.50 | -18.32 | -40.56 | 0.56  | -520.82 |
| FCN      | $^1J_{CF}$ | PBE0/pc-2                    | M06L/pcJ-2              | -350.26 | -13.15 | -31.77 | 0.57  | -394.61 |
| FCN      | $^1J_{CF}$ | PBE0/aug-pc-2                | PBE0/aug-pcJ-2          | -459.80 | -18.30 | -40.70 | 0.56  | -518.24 |
| FCN      | $^1J_{CF}$ | PBE0/aug-pc-2                | M06L/aug-pcJ-2          | -349.78 | -13.08 | -31.71 | 0.56  | -394.00 |
| FCN      | $^1J_{CF}$ | M06L/pc-2                    | B3LYP/pcJ-2             | -473.87 | -17.20 | -40.75 | 0.55  | -531.27 |
| FCN      | $^1J_{CF}$ | M06L/pc-2                    | PBE0/pcJ-2              | -465.23 | -19.11 | -41.93 | 0.55  | -525.73 |
| FCN      | $^1J_{CF}$ | M06L/pc-2                    | M06L/pcJ-2              | -353.63 | -13.71 | -32.73 | 0.56  | -399.50 |
| FCN      | $^1J_{CF}$ | M06L/aug-pc-2                | PBE0/aug-pcJ-2          | -463.15 | -19.07 | -42.01 | 0.55  | -523.68 |
| FCN      | $^1J_{CF}$ | M06L/aug-pc-2                | M06L/aug-pcJ-2          | -353.61 | -13.61 | -32.62 | 0.56  | -399.29 |
| FCN      | $^2J_{NF}$ | CCSD(T)/aug-cc-pCVQZ         | B3LYP/pcJ-2             | 52.45   | -15.24 | 16.16  | 0.41  | 53.78   |
| FCN      | $^2J_{NF}$ | CCSD(T)/aug-cc-pCVQZ         | PBE0/pcJ-2              | 50.46   | -15.39 | 16.73  | 0.41  | 52.21   |
| FCN      | $^2J_{NF}$ | CCSD(T)/aug-cc-pCVQZ         | M06L/pcJ-2              | 42.03   | -12.94 | 16.97  | 0.41  | 46.48   |
| FCN      | $^2J_{NF}$ | B3LYP/pc-2                   | B3LYP/pcJ-2             | 52.48   | -14.86 | 15.99  | 0.42  | 54.03   |
| FCN      | $^2J_{NF}$ | B3LYP/pc-2                   | PBE0/pcJ-2              | 50.47   | -14.99 | 16.58  | 0.42  | 52.48   |
| FCN      | $^2J_{NF}$ | B3LYP/pc-2                   | M06L/pcJ-2              | 42.58   | -12.67 | 16.81  | 0.42  | 47.14   |
| FCN      | $^2J_{NF}$ | PBE0/pc-2                    | B3LYP/pcJ-2             | 52.77   | -15.19 | 14.90  | 0.42  | 52.91   |
| FCN      | $^2J_{NF}$ | PBE0/pc-2                    | PBE0/pcJ-2              | 50.75   | -15.32 | 15.50  | 0.42  | 51.36   |
| FCN      | $^2J_{NF}$ | PBE0/pc-2                    | M06L/pcJ-2              | 42.73   | -12.93 | 15.98  | 0.42  | 46.21   |
| FCN      | $^2J_{NF}$ | PBE0/aug-pc-2                | PBE0/aug-pcJ-2          | 50.88   | -15.23 | 15.56  | 0.42  | 51.63   |
| FCN      | $^2J_{NF}$ | PBE0/aug-pc-2                | M06L/aug-pcJ-2          | 43.13   | -12.89 | 15.97  | 0.42  | 46.63   |
| FCN      | $^2J_{NF}$ | M06L/pc-2                    | B3LYP/pcJ-2             | 52.81   | -15.54 | 14.86  | 0.42  | 52.55   |
| FCN      | $^2J_{NF}$ | M06L/pc-2                    | PBE0/pcJ-2              | 50.80   | -15.69 | 15.46  | 0.42  | 50.99   |

Continued on next page

(Continued)

| Molecule | Coupling          | Geometry optimization method | SSCC calculation method | FC     | SD     | PSO    | DSO   | Total  |
|----------|-------------------|------------------------------|-------------------------|--------|--------|--------|-------|--------|
| FCN      | $^2J_{\text{NF}}$ | M06L/pc-2                    | M06L/pcJ-2              | 42.35  | -13.18 | 15.98  | 0.42  | 45.56  |
| FCN      | $^2J_{\text{NF}}$ | M06L/aug-pc-2                | PBE0/aug-pcJ-2          | 50.92  | -15.58 | 15.56  | 0.42  | 51.33  |
| FCN      | $^2J_{\text{NF}}$ | M06L/aug-pc-2                | M06L/aug-pcJ-2          | 42.73  | -13.13 | 16.01  | 0.42  | 46.04  |
| FNO      | $^1J_{\text{NF}}$ | CCSD(T)/aug-cc-pCVQZ         | B3LYP/pcJ-2             | 147.25 | -12.76 | 54.44  | -0.27 | 188.67 |
| FNO      | $^1J_{\text{NF}}$ | CCSD(T)/aug-cc-pCVQZ         | PBE0/pcJ-2              | 154.36 | -13.87 | 51.03  | -0.27 | 191.26 |
| FNO      | $^1J_{\text{NF}}$ | CCSD(T)/aug-cc-pCVQZ         | M06L/pcJ-2              | 201.19 | -9.40  | 52.79  | -0.27 | 244.31 |
| FNO      | $^1J_{\text{NF}}$ | B3LYP/pc-2                   | B3LYP/pcJ-2             | 130.87 | -13.96 | 54.32  | -0.27 | 170.97 |
| FNO      | $^1J_{\text{NF}}$ | B3LYP/pc-2                   | PBE0/pcJ-2              | 139.02 | -15.32 | 50.68  | -0.27 | 174.11 |
| FNO      | $^1J_{\text{NF}}$ | B3LYP/pc-2                   | M06L/pcJ-2              | 185.53 | -10.34 | 53.13  | -0.26 | 228.06 |
| FNO      | $^1J_{\text{NF}}$ | PBE0/pc-2                    | B3LYP/pcJ-2             | 167.63 | -11.06 | 53.31  | -0.28 | 209.60 |
| FNO      | $^1J_{\text{NF}}$ | PBE0/pc-2                    | PBE0/pcJ-2              | 173.81 | -11.88 | 50.20  | -0.28 | 211.85 |
| FNO      | $^1J_{\text{NF}}$ | PBE0/pc-2                    | M06L/pcJ-2              | 218.07 | -8.11  | 51.40  | -0.28 | 261.08 |
| FNO      | $^1J_{\text{NF}}$ | PBE0/aug-pc-2                | PBE0/aug-pcJ-2          | 171.04 | -11.94 | 49.76  | -0.28 | 208.59 |
| FNO      | $^1J_{\text{NF}}$ | PBE0/aug-pc-2                | M06L/aug-pcJ-2          | 218.00 | -8.12  | 51.35  | -0.28 | 260.95 |
| FNO      | $^1J_{\text{NF}}$ | M06L/pc-2                    | B3LYP/pcJ-2             | 113.11 | -15.46 | 55.37  | -0.26 | 152.76 |
| FNO      | $^1J_{\text{NF}}$ | M06L/pc-2                    | PBE0/pcJ-2              | 122.10 | -17.16 | 51.44  | -0.26 | 156.12 |
| FNO      | $^1J_{\text{NF}}$ | M06L/pc-2                    | M06L/pcJ-2              | 167.59 | -11.46 | 54.48  | -0.26 | 210.34 |
| FNO      | $^1J_{\text{NF}}$ | M06L/aug-pc-2                | PBE0/aug-pcJ-2          | 121.23 | -17.14 | 50.86  | -0.26 | 154.69 |
| FNO      | $^1J_{\text{NF}}$ | M06L/aug-pc-2                | M06L/aug-pcJ-2          | 169.26 | -11.46 | 54.39  | -0.26 | 211.93 |
| FNO      | $^1J_{\text{NO}}$ | CCSD(T)/aug-cc-pCVQZ         | B3LYP/pcJ-2             | -23.82 | 0.22   | -19.18 | -0.01 | -42.78 |
| FNO      | $^1J_{\text{NO}}$ | CCSD(T)/aug-cc-pCVQZ         | PBE0/pcJ-2              | -23.17 | 0.15   | -19.06 | -0.01 | -42.09 |
| FNO      | $^1J_{\text{NO}}$ | CCSD(T)/aug-cc-pCVQZ         | M06L/pcJ-2              | -12.20 | 1.04   | -16.06 | -0.01 | -27.23 |
| FNO      | $^1J_{\text{NO}}$ | B3LYP/pc-2                   | B3LYP/pcJ-2             | -23.11 | 0.18   | -18.95 | -0.01 | -41.90 |
| FNO      | $^1J_{\text{NO}}$ | B3LYP/pc-2                   | PBE0/pcJ-2              | -22.50 | 0.09   | -18.82 | -0.01 | -41.23 |
| FNO      | $^1J_{\text{NO}}$ | B3LYP/pc-2                   | M06L/pcJ-2              | -11.84 | 0.98   | -15.97 | -0.01 | -26.83 |
| FNO      | $^1J_{\text{NO}}$ | PBE0/pc-2                    | B3LYP/pcJ-2             | -23.35 | 0.10   | -19.07 | -0.01 | -42.32 |
| FNO      | $^1J_{\text{NO}}$ | PBE0/pc-2                    | PBE0/pcJ-2              | -22.76 | 0.01   | -18.97 | -0.01 | -41.72 |
| FNO      | $^1J_{\text{NO}}$ | PBE0/pc-2                    | M06L/pcJ-2              | -12.06 | 0.91   | -15.95 | -0.01 | -27.11 |
| FNO      | $^1J_{\text{NO}}$ | PBE0/aug-pc-2                | PBE0/aug-pcJ-2          | -22.05 | 0.12   | -18.77 | -0.01 | -40.71 |
| FNO      | $^1J_{\text{NO}}$ | PBE0/aug-pc-2                | M06L/aug-pcJ-2          | -11.87 | 0.91   | -15.87 | -0.01 | -26.84 |
| FNO      | $^1J_{\text{NO}}$ | M06L/pc-2                    | B3LYP/pcJ-2             | -23.11 | 0.20   | -18.97 | -0.01 | -41.90 |
| FNO      | $^1J_{\text{NO}}$ | M06L/pc-2                    | PBE0/pcJ-2              | -22.47 | 0.11   | -18.82 | -0.01 | -41.19 |
| FNO      | $^1J_{\text{NO}}$ | M06L/pc-2                    | M06L/pcJ-2              | -11.81 | 1.01   | -16.02 | -0.01 | -26.84 |
| FNO      | $^1J_{\text{NO}}$ | M06L/aug-pc-2                | PBE0/aug-pcJ-2          | -21.88 | 0.23   | -18.63 | -0.01 | -40.30 |
| FNO      | $^1J_{\text{NO}}$ | M06L/aug-pc-2                | M06L/aug-pcJ-2          | -11.68 | 1.01   | -15.95 | -0.01 | -26.63 |
| FNO      | $^2J_{\text{OF}}$ | CCSD(T)/aug-cc-pCVQZ         | B3LYP/pcJ-2             | -21.69 | 7.70   | 206.55 | 0.26  | 192.82 |
| FNO      | $^2J_{\text{OF}}$ | CCSD(T)/aug-cc-pCVQZ         | PBE0/pcJ-2              | -23.20 | 9.61   | 204.88 | 0.26  | 191.56 |
| FNO      | $^2J_{\text{OF}}$ | CCSD(T)/aug-cc-pCVQZ         | M06L/pcJ-2              | -61.52 | 1.74   | 157.39 | 0.26  | 97.87  |
| FNO      | $^2J_{\text{OF}}$ | B3LYP/pc-2                   | B3LYP/pcJ-2             | -20.86 | 5.17   | 205.05 | 0.26  | 189.63 |
| FNO      | $^2J_{\text{OF}}$ | B3LYP/pc-2                   | PBE0/pcJ-2              | -22.38 | 6.65   | 203.08 | 0.26  | 187.61 |
| FNO      | $^2J_{\text{OF}}$ | B3LYP/pc-2                   | M06L/pcJ-2              | -61.61 | -0.22  | 156.37 | 0.26  | 94.80  |
| FNO      | $^2J_{\text{OF}}$ | PBE0/pc-2                    | B3LYP/pcJ-2             | -21.59 | 9.67   | 201.71 | 0.28  | 190.07 |
| FNO      | $^2J_{\text{OF}}$ | PBE0/pc-2                    | PBE0/pcJ-2              | -23.09 | 11.80  | 200.26 | 0.28  | 189.25 |
| FNO      | $^2J_{\text{OF}}$ | PBE0/pc-2                    | M06L/pcJ-2              | -59.59 | 3.74   | 154.13 | 0.28  | 98.56  |
| FNO      | $^2J_{\text{OF}}$ | PBE0/aug-pc-2                | PBE0/aug-pcJ-2          | -22.24 | 11.26  | 199.14 | 0.28  | 188.44 |
| FNO      | $^2J_{\text{OF}}$ | PBE0/aug-pc-2                | M06L/aug-pcJ-2          | -58.77 | 3.53   | 153.82 | 0.28  | 98.85  |
| FNO      | $^2J_{\text{OF}}$ | M06L/pc-2                    | B3LYP/pcJ-2             | -20.45 | 2.60   | 207.50 | 0.25  | 189.91 |
| FNO      | $^2J_{\text{OF}}$ | M06L/pc-2                    | PBE0/pcJ-2              | -21.99 | 3.62   | 205.24 | 0.25  | 187.13 |
| FNO      | $^2J_{\text{OF}}$ | M06L/pc-2                    | M06L/pcJ-2              | -62.53 | -2.37  | 158.09 | 0.25  | 93.44  |

Continued on next page

(Continued)

| Molecule          | Coupling          | Geometry optimization method | SSCC calculation method | FC     | SD    | PSO    | DSO  | Total  |
|-------------------|-------------------|------------------------------|-------------------------|--------|-------|--------|------|--------|
| FNO               | $^2J_{\text{OF}}$ | M06L/aug-pc-2                | PBE0/aug-pcJ-2          | -21.44 | 3.22  | 203.96 | 0.25 | 186.00 |
| FNO               | $^2J_{\text{OF}}$ | M06L/aug-pc-2                | M06L/aug-pcJ-2          | -62.09 | -2.49 | 157.86 | 0.25 | 93.53  |
| H <sub>2</sub> CO | $^1J_{\text{CO}}$ | CCSD(T)/aug-cc-pCVQZ         | B3LYP/pcJ-2             | 14.59  | -2.68 | 23.55  | 0.01 | 35.46  |
| H <sub>2</sub> CO | $^1J_{\text{CO}}$ | CCSD(T)/aug-cc-pCVQZ         | PBE0/pcJ-2              | 14.84  | -3.14 | 23.40  | 0.01 | 35.11  |
| H <sub>2</sub> CO | $^1J_{\text{CO}}$ | CCSD(T)/aug-cc-pCVQZ         | M06L/pcJ-2              | -1.71  | -3.03 | 19.35  | 0.00 | 14.61  |
| H <sub>2</sub> CO | $^1J_{\text{CO}}$ | B3LYP/pc-2                   | B3LYP/pcJ-2             | 13.47  | -2.63 | 23.13  | 0.01 | 33.97  |
| H <sub>2</sub> CO | $^1J_{\text{CO}}$ | B3LYP/pc-2                   | PBE0/pcJ-2              | 13.76  | -3.04 | 22.97  | 0.01 | 33.70  |
| H <sub>2</sub> CO | $^1J_{\text{CO}}$ | B3LYP/pc-2                   | M06L/pcJ-2              | -2.19  | -2.98 | 19.03  | 0.00 | 13.87  |
| H <sub>2</sub> CO | $^1J_{\text{CO}}$ | PBE0/pc-2                    | B3LYP/pcJ-2             | 12.68  | -2.58 | 22.97  | 0.01 | 33.08  |
| H <sub>2</sub> CO | $^1J_{\text{CO}}$ | PBE0/pc-2                    | PBE0/pcJ-2              | 13.01  | -2.98 | 22.81  | 0.01 | 32.86  |
| H <sub>2</sub> CO | $^1J_{\text{CO}}$ | PBE0/pc-2                    | M06L/pcJ-2              | -2.57  | -2.93 | 18.92  | 0.00 | 13.42  |
| H <sub>2</sub> CO | $^1J_{\text{CO}}$ | PBE0/aug-pc-2                | PBE0/aug-pcJ-2          | 12.90  | -2.96 | 22.80  | 0.01 | 32.74  |
| H <sub>2</sub> CO | $^1J_{\text{CO}}$ | PBE0/aug-pc-2                | M06L/aug-pcJ-2          | -2.55  | -2.88 | 18.93  | 0.00 | 13.51  |
| H <sub>2</sub> CO | $^1J_{\text{CO}}$ | M06L/pc-2                    | B3LYP/pcJ-2             | 12.53  | -2.59 | 22.73  | 0.01 | 32.69  |
| H <sub>2</sub> CO | $^1J_{\text{CO}}$ | M06L/pc-2                    | PBE0/pcJ-2              | 12.87  | -2.97 | 22.58  | 0.01 | 32.49  |
| H <sub>2</sub> CO | $^1J_{\text{CO}}$ | M06L/pc-2                    | M06L/pcJ-2              | -2.60  | -2.94 | 18.74  | 0.01 | 13.20  |
| H <sub>2</sub> CO | $^1J_{\text{CO}}$ | M06L/aug-pc-2                | PBE0/aug-pcJ-2          | 12.80  | -2.96 | 22.58  | 0.01 | 32.42  |
| H <sub>2</sub> CO | $^1J_{\text{CO}}$ | M06L/aug-pc-2                | M06L/aug-pcJ-2          | -2.55  | -2.89 | 18.75  | 0.01 | 13.32  |
| H <sub>2</sub> CO | $^1J_{\text{CH}}$ | CCSD(T)/aug-cc-pCVQZ         | B3LYP/pcJ-2             | 182.67 | 0.50  | -0.87  | 0.62 | 182.93 |
| H <sub>2</sub> CO | $^1J_{\text{CH}}$ | CCSD(T)/aug-cc-pCVQZ         | PBE0/pcJ-2              | 171.35 | 0.49  | -0.94  | 0.64 | 171.54 |
| H <sub>2</sub> CO | $^1J_{\text{CH}}$ | CCSD(T)/aug-cc-pCVQZ         | M06L/pcJ-2              | 213.58 | 0.37  | -0.74  | 0.65 | 213.86 |
| H <sub>2</sub> CO | $^1J_{\text{CH}}$ | B3LYP/pc-2                   | B3LYP/pcJ-2             | 182.38 | 0.48  | -0.85  | 0.63 | 182.65 |
| H <sub>2</sub> CO | $^1J_{\text{CH}}$ | B3LYP/pc-2                   | PBE0/pcJ-2              | 170.98 | 0.47  | -0.92  | 0.65 | 171.17 |
| H <sub>2</sub> CO | $^1J_{\text{CH}}$ | B3LYP/pc-2                   | M06L/pcJ-2              | 212.27 | 0.36  | -0.73  | 0.66 | 212.56 |
| H <sub>2</sub> CO | $^1J_{\text{CH}}$ | PBE0/pc-2                    | B3LYP/pcJ-2             | 182.20 | 0.47  | -0.84  | 0.64 | 182.47 |
| H <sub>2</sub> CO | $^1J_{\text{CH}}$ | PBE0/pc-2                    | PBE0/pcJ-2              | 170.77 | 0.46  | -0.91  | 0.65 | 170.96 |
| H <sub>2</sub> CO | $^1J_{\text{CH}}$ | PBE0/pc-2                    | M06L/pcJ-2              | 211.80 | 0.36  | -0.73  | 0.67 | 212.09 |
| H <sub>2</sub> CO | $^1J_{\text{CH}}$ | PBE0/aug-pc-2                | PBE0/aug-pcJ-2          | 171.06 | 0.46  | -0.94  | 0.65 | 171.23 |
| H <sub>2</sub> CO | $^1J_{\text{CH}}$ | PBE0/aug-pc-2                | M06L/aug-pcJ-2          | 212.15 | 0.36  | -0.75  | 0.66 | 212.42 |
| H <sub>2</sub> CO | $^1J_{\text{CH}}$ | M06L/pc-2                    | B3LYP/pcJ-2             | 181.80 | 0.47  | -0.84  | 0.64 | 182.08 |
| H <sub>2</sub> CO | $^1J_{\text{CH}}$ | M06L/pc-2                    | PBE0/pcJ-2              | 170.36 | 0.46  | -0.91  | 0.65 | 170.56 |
| H <sub>2</sub> CO | $^1J_{\text{CH}}$ | M06L/pc-2                    | M06L/pcJ-2              | 210.77 | 0.35  | -0.73  | 0.67 | 211.06 |
| H <sub>2</sub> CO | $^1J_{\text{CH}}$ | M06L/aug-pc-2                | PBE0/aug-pcJ-2          | 170.66 | 0.45  | -0.94  | 0.65 | 170.83 |
| H <sub>2</sub> CO | $^1J_{\text{CH}}$ | M06L/aug-pc-2                | M06L/aug-pcJ-2          | 211.16 | 0.36  | -0.75  | 0.66 | 211.43 |
| H <sub>2</sub> CO | $^2J_{\text{OH}}$ | CCSD(T)/aug-cc-pCVQZ         | B3LYP/pcJ-2             | -5.85  | -1.10 | 3.55   | 0.50 | -2.90  |
| H <sub>2</sub> CO | $^2J_{\text{OH}}$ | CCSD(T)/aug-cc-pCVQZ         | PBE0/pcJ-2              | -5.36  | -1.23 | 3.58   | 0.50 | -2.50  |
| H <sub>2</sub> CO | $^2J_{\text{OH}}$ | CCSD(T)/aug-cc-pCVQZ         | M06L/pcJ-2              | -0.76  | -0.78 | 3.04   | 0.50 | 2.01   |
| H <sub>2</sub> CO | $^2J_{\text{OH}}$ | B3LYP/pc-2                   | B3LYP/pcJ-2             | -5.96  | -1.06 | 3.45   | 0.51 | -3.07  |
| H <sub>2</sub> CO | $^2J_{\text{OH}}$ | B3LYP/pc-2                   | PBE0/pcJ-2              | -5.46  | -1.18 | 3.47   | 0.51 | -2.67  |
| H <sub>2</sub> CO | $^2J_{\text{OH}}$ | B3LYP/pc-2                   | M06L/pcJ-2              | -1.06  | -0.74 | 2.95   | 0.50 | 1.65   |
| H <sub>2</sub> CO | $^2J_{\text{OH}}$ | PBE0/pc-2                    | B3LYP/pcJ-2             | -6.00  | -1.05 | 3.41   | 0.51 | -3.13  |
| H <sub>2</sub> CO | $^2J_{\text{OH}}$ | PBE0/pc-2                    | PBE0/pcJ-2              | -5.51  | -1.16 | 3.44   | 0.51 | -2.73  |
| H <sub>2</sub> CO | $^2J_{\text{OH}}$ | PBE0/pc-2                    | M06L/pcJ-2              | -1.17  | -0.73 | 2.92   | 0.51 | 1.53   |
| H <sub>2</sub> CO | $^2J_{\text{OH}}$ | PBE0/aug-pc-2                | PBE0/aug-pcJ-2          | -5.42  | -1.16 | 3.44   | 0.51 | -2.64  |
| H <sub>2</sub> CO | $^2J_{\text{OH}}$ | PBE0/aug-pc-2                | M06L/aug-pcJ-2          | -1.10  | -0.73 | 2.93   | 0.51 | 1.59   |
| H <sub>2</sub> CO | $^2J_{\text{OH}}$ | M06L/pc-2                    | B3LYP/pcJ-2             | -6.06  | -1.03 | 3.35   | 0.51 | -3.23  |
| H <sub>2</sub> CO | $^2J_{\text{OH}}$ | M06L/pc-2                    | PBE0/pcJ-2              | -5.57  | -1.14 | 3.37   | 0.51 | -2.82  |
| H <sub>2</sub> CO | $^2J_{\text{OH}}$ | M06L/pc-2                    | M06L/pcJ-2              | -1.34  | -0.71 | 2.86   | 0.51 | 1.32   |
| H <sub>2</sub> CO | $^2J_{\text{OH}}$ | M06L/aug-pc-2                | PBE0/aug-pcJ-2          | -5.48  | -1.13 | 3.38   | 0.51 | -2.73  |

Continued on next page

(Continued)

| Molecule          | Coupling                     | Geometry optimization method | SSCC calculation method | FC     | SD    | PSO    | DSO   | Total   |
|-------------------|------------------------------|------------------------------|-------------------------|--------|-------|--------|-------|---------|
| H <sub>2</sub> CO | <sup>2</sup> J <sub>OH</sub> | M06L/aug-pc-2                | M06L/aug-pcJ-2          | -1.26  | -0.71 | 2.87   | 0.51  | 1.40    |
| H <sub>2</sub> CO | <sup>2</sup> J <sub>HH</sub> | CCSD(T)/aug-cc-pCVQZ         | B3LYP/pcJ-2             | 44.19  | 0.39  | 3.61   | -3.54 | 44.65   |
| H <sub>2</sub> CO | <sup>2</sup> J <sub>HH</sub> | CCSD(T)/aug-cc-pCVQZ         | PBE0/pcJ-2              | 40.20  | 0.42  | 3.60   | -3.53 | 40.69   |
| H <sub>2</sub> CO | <sup>2</sup> J <sub>HH</sub> | CCSD(T)/aug-cc-pCVQZ         | M06L/pcJ-2              | 31.56  | 0.47  | 3.55   | -3.52 | 32.06   |
| H <sub>2</sub> CO | <sup>2</sup> J <sub>HH</sub> | B3LYP/pc-2                   | B3LYP/pcJ-2             | 45.10  | 0.40  | 3.51   | -3.44 | 45.57   |
| H <sub>2</sub> CO | <sup>2</sup> J <sub>HH</sub> | B3LYP/pc-2                   | PBE0/pcJ-2              | 41.04  | 0.43  | 3.50   | -3.43 | 41.53   |
| H <sub>2</sub> CO | <sup>2</sup> J <sub>HH</sub> | B3LYP/pc-2                   | M06L/pcJ-2              | 31.88  | 0.48  | 3.45   | -3.42 | 32.39   |
| H <sub>2</sub> CO | <sup>2</sup> J <sub>HH</sub> | PBE0/pc-2                    | B3LYP/pcJ-2             | 45.84  | 0.40  | 3.50   | -3.43 | 46.31   |
| H <sub>2</sub> CO | <sup>2</sup> J <sub>HH</sub> | PBE0/pc-2                    | PBE0/pcJ-2              | 41.73  | 0.42  | 3.49   | -3.42 | 42.22   |
| H <sub>2</sub> CO | <sup>2</sup> J <sub>HH</sub> | PBE0/pc-2                    | M06L/pcJ-2              | 32.46  | 0.47  | 3.44   | -3.41 | 32.96   |
| H <sub>2</sub> CO | <sup>2</sup> J <sub>HH</sub> | PBE0/aug-pc-2                | PBE0/aug-pcJ-2          | 41.90  | 0.42  | 3.47   | -3.43 | 42.35   |
| H <sub>2</sub> CO | <sup>2</sup> J <sub>HH</sub> | PBE0/aug-pc-2                | M06L/aug-pcJ-2          | 33.02  | 0.46  | 3.42   | -3.42 | 33.49   |
| H <sub>2</sub> CO | <sup>2</sup> J <sub>HH</sub> | M06L/pc-2                    | B3LYP/pcJ-2             | 45.10  | 0.42  | 3.40   | -3.33 | 45.59   |
| H <sub>2</sub> CO | <sup>2</sup> J <sub>HH</sub> | M06L/pc-2                    | PBE0/pcJ-2              | 41.02  | 0.45  | 3.39   | -3.31 | 41.54   |
| H <sub>2</sub> CO | <sup>2</sup> J <sub>HH</sub> | M06L/pc-2                    | M06L/pcJ-2              | 31.23  | 0.49  | 3.34   | -3.31 | 31.76   |
| H <sub>2</sub> CO | <sup>2</sup> J <sub>HH</sub> | M06L/aug-pc-2                | PBE0/aug-pcJ-2          | 41.16  | 0.44  | 3.37   | -3.33 | 41.65   |
| H <sub>2</sub> CO | <sup>2</sup> J <sub>HH</sub> | M06L/aug-pc-2                | M06L/aug-pcJ-2          | 31.77  | 0.49  | 3.33   | -3.32 | 32.26   |
| H <sub>2</sub> O  | <sup>1</sup> J <sub>OH</sub> | CCSD(T)/aug-cc-pCVQZ         | B3LYP/pcJ-2             | -61.63 | -0.55 | -13.02 | -0.03 | -75.23  |
| H <sub>2</sub> O  | <sup>1</sup> J <sub>OH</sub> | CCSD(T)/aug-cc-pCVQZ         | PBE0/pcJ-2              | -58.39 | -0.42 | -12.80 | -0.03 | -71.64  |
| H <sub>2</sub> O  | <sup>1</sup> J <sub>OH</sub> | CCSD(T)/aug-cc-pCVQZ         | M06L/pcJ-2              | -87.75 | -0.47 | -11.51 | -0.03 | -99.76  |
| H <sub>2</sub> O  | <sup>1</sup> J <sub>OH</sub> | B3LYP/pc-2                   | B3LYP/pcJ-2             | -61.77 | -0.54 | -12.92 | -0.03 | -75.25  |
| H <sub>2</sub> O  | <sup>1</sup> J <sub>OH</sub> | B3LYP/pc-2                   | PBE0/pcJ-2              | -58.53 | -0.41 | -12.71 | -0.03 | -71.68  |
| H <sub>2</sub> O  | <sup>1</sup> J <sub>OH</sub> | B3LYP/pc-2                   | M06L/pcJ-2              | -87.95 | -0.46 | -11.42 | -0.03 | -99.85  |
| H <sub>2</sub> O  | <sup>1</sup> J <sub>OH</sub> | PBE0/pc-2                    | B3LYP/pcJ-2             | -62.38 | -0.56 | -13.00 | -0.03 | -75.97  |
| H <sub>2</sub> O  | <sup>1</sup> J <sub>OH</sub> | PBE0/pc-2                    | PBE0/pcJ-2              | -59.11 | -0.43 | -12.78 | -0.03 | -72.36  |
| H <sub>2</sub> O  | <sup>1</sup> J <sub>OH</sub> | PBE0/pc-2                    | M06L/pcJ-2              | -88.35 | -0.48 | -11.49 | -0.03 | -100.35 |
| H <sub>2</sub> O  | <sup>1</sup> J <sub>OH</sub> | PBE0/aug-pc-2                | PBE0/aug-pcJ-2          | -60.27 | -0.56 | -12.60 | -0.03 | -73.46  |
| H <sub>2</sub> O  | <sup>1</sup> J <sub>OH</sub> | PBE0/aug-pc-2                | M06L/aug-pcJ-2          | -89.04 | -0.56 | -11.41 | -0.03 | -101.04 |
| H <sub>2</sub> O  | <sup>1</sup> J <sub>OH</sub> | M06L/pc-2                    | B3LYP/pcJ-2             | -61.81 | -0.57 | -13.10 | -0.03 | -75.50  |
| H <sub>2</sub> O  | <sup>1</sup> J <sub>OH</sub> | M06L/pc-2                    | PBE0/pcJ-2              | -58.55 | -0.44 | -12.88 | -0.03 | -71.90  |
| H <sub>2</sub> O  | <sup>1</sup> J <sub>OH</sub> | M06L/pc-2                    | M06L/pcJ-2              | -87.82 | -0.48 | -11.59 | -0.03 | -99.91  |
| H <sub>2</sub> O  | <sup>1</sup> J <sub>OH</sub> | M06L/aug-pc-2                | PBE0/aug-pcJ-2          | -59.76 | -0.57 | -12.70 | -0.03 | -73.06  |
| H <sub>2</sub> O  | <sup>1</sup> J <sub>OH</sub> | M06L/aug-pc-2                | M06L/aug-pcJ-2          | -88.55 | -0.57 | -11.50 | -0.03 | -100.65 |
| H <sub>2</sub> O  | <sup>2</sup> J <sub>HH</sub> | CCSD(T)/aug-cc-pCVQZ         | B3LYP/pcJ-2             | -10.49 | 0.93  | 9.57   | -7.20 | -7.19   |
| H <sub>2</sub> O  | <sup>2</sup> J <sub>HH</sub> | CCSD(T)/aug-cc-pCVQZ         | PBE0/pcJ-2              | -10.51 | 0.96  | 9.52   | -7.21 | -7.23   |
| H <sub>2</sub> O  | <sup>2</sup> J <sub>HH</sub> | CCSD(T)/aug-cc-pCVQZ         | M06L/pcJ-2              | -18.06 | 0.90  | 9.11   | -7.21 | -15.26  |
| H <sub>2</sub> O  | <sup>2</sup> J <sub>HH</sub> | B3LYP/pc-2                   | B3LYP/pcJ-2             | -9.69  | 0.89  | 9.64   | -7.29 | -6.45   |
| H <sub>2</sub> O  | <sup>2</sup> J <sub>HH</sub> | B3LYP/pc-2                   | PBE0/pcJ-2              | -9.76  | 0.92  | 9.60   | -7.30 | -6.54   |
| H <sub>2</sub> O  | <sup>2</sup> J <sub>HH</sub> | B3LYP/pc-2                   | M06L/pcJ-2              | -17.21 | 0.86  | 9.18   | -7.30 | -14.48  |
| H <sub>2</sub> O  | <sup>2</sup> J <sub>HH</sub> | PBE0/pc-2                    | B3LYP/pcJ-2             | -10.03 | 0.91  | 9.68   | -7.30 | -6.74   |
| H <sub>2</sub> O  | <sup>2</sup> J <sub>HH</sub> | PBE0/pc-2                    | PBE0/pcJ-2              | -10.08 | 0.94  | 9.63   | -7.31 | -6.82   |
| H <sub>2</sub> O  | <sup>2</sup> J <sub>HH</sub> | PBE0/pc-2                    | M06L/pcJ-2              | -17.57 | 0.88  | 9.21   | -7.32 | -14.79  |
| H <sub>2</sub> O  | <sup>2</sup> J <sub>HH</sub> | PBE0/aug-pc-2                | PBE0/aug-pcJ-2          | -10.25 | 0.97  | 9.62   | -7.29 | -6.95   |
| H <sub>2</sub> O  | <sup>2</sup> J <sub>HH</sub> | PBE0/aug-pc-2                | M06L/aug-pcJ-2          | -17.74 | 0.88  | 9.22   | -7.29 | -14.92  |
| H <sub>2</sub> O  | <sup>2</sup> J <sub>HH</sub> | M06L/pc-2                    | B3LYP/pcJ-2             | -11.01 | 0.96  | 9.55   | -7.16 | -7.67   |
| H <sub>2</sub> O  | <sup>2</sup> J <sub>HH</sub> | M06L/pc-2                    | PBE0/pcJ-2              | -11.00 | 0.99  | 9.50   | -7.17 | -7.69   |
| H <sub>2</sub> O  | <sup>2</sup> J <sub>HH</sub> | M06L/pc-2                    | M06L/pcJ-2              | -18.61 | 0.93  | 9.08   | -7.17 | -15.77  |
| H <sub>2</sub> O  | <sup>2</sup> J <sub>HH</sub> | M06L/aug-pc-2                | PBE0/aug-pcJ-2          | -11.13 | 1.02  | 9.49   | -7.16 | -7.78   |
| H <sub>2</sub> O  | <sup>2</sup> J <sub>HH</sub> | M06L/aug-pc-2                | M06L/aug-pcJ-2          | -18.73 | 0.93  | 9.10   | -7.16 | -15.86  |

Continued on next page

(Continued)

| Molecule | Coupling   | Geometry optimization method | SSCC calculation method | FC     | SD    | PSO   | DSO   | Total  |
|----------|------------|------------------------------|-------------------------|--------|-------|-------|-------|--------|
| HCCH     | $^1J_{CC}$ | CCSD(T)/aug-cc-pCVQZ         | B3LYP/pcJ-2             | 182.08 | 12.91 | 8.49  | 0.01  | 203.48 |
| HCCH     | $^1J_{CC}$ | CCSD(T)/aug-cc-pCVQZ         | PBE0/pcJ-2              | 174.44 | 13.59 | 8.45  | 0.01  | 196.48 |
| HCCH     | $^1J_{CC}$ | CCSD(T)/aug-cc-pCVQZ         | M06L/pcJ-2              | 200.68 | 13.48 | 6.56  | 0.02  | 220.75 |
| HCCH     | $^1J_{CC}$ | B3LYP/pc-2                   | B3LYP/pcJ-2             | 182.85 | 12.58 | 8.29  | 0.01  | 203.73 |
| HCCH     | $^1J_{CC}$ | B3LYP/pc-2                   | PBE0/pcJ-2              | 175.17 | 13.23 | 8.24  | 0.01  | 196.65 |
| HCCH     | $^1J_{CC}$ | B3LYP/pc-2                   | M06L/pcJ-2              | 199.93 | 13.15 | 6.45  | 0.02  | 219.55 |
| HCCH     | $^1J_{CC}$ | PBE0/pc-2                    | B3LYP/pcJ-2             | 182.95 | 12.59 | 8.32  | 0.01  | 203.87 |
| HCCH     | $^1J_{CC}$ | PBE0/pc-2                    | PBE0/pcJ-2              | 175.27 | 13.24 | 8.27  | 0.01  | 196.79 |
| HCCH     | $^1J_{CC}$ | PBE0/pc-2                    | M06L/pcJ-2              | 200.06 | 13.16 | 6.47  | 0.02  | 219.71 |
| HCCH     | $^1J_{CC}$ | PBE0/aug-pc-2                | PBE0/aug-pcJ-2          | 175.15 | 13.25 | 8.25  | 0.01  | 196.67 |
| HCCH     | $^1J_{CC}$ | PBE0/aug-pc-2                | M06L/aug-pcJ-2          | 199.56 | 13.08 | 6.43  | 0.02  | 219.09 |
| HCCH     | $^1J_{CC}$ | M06L/pc-2                    | B3LYP/pcJ-2             | 182.79 | 12.57 | 8.27  | 0.01  | 203.64 |
| HCCH     | $^1J_{CC}$ | M06L/pc-2                    | PBE0/pcJ-2              | 175.11 | 13.22 | 8.22  | 0.01  | 196.56 |
| HCCH     | $^1J_{CC}$ | M06L/pc-2                    | M06L/pcJ-2              | 199.86 | 13.14 | 6.43  | 0.02  | 219.44 |
| HCCH     | $^1J_{CC}$ | M06L/aug-pc-2                | PBE0/aug-pcJ-2          | 175.00 | 13.23 | 8.21  | 0.01  | 196.45 |
| HCCH     | $^1J_{CC}$ | M06L/aug-pc-2                | M06L/aug-pcJ-2          | 199.37 | 13.06 | 6.38  | 0.02  | 218.83 |
| HCCH     | $^1J_{CH}$ | CCSD(T)/aug-cc-pCVQZ         | B3LYP/pcJ-2             | 272.17 | 0.53  | -0.94 | 0.29  | 272.05 |
| HCCH     | $^1J_{CH}$ | CCSD(T)/aug-cc-pCVQZ         | PBE0/pcJ-2              | 256.82 | 0.46  | -1.12 | 0.30  | 256.47 |
| HCCH     | $^1J_{CH}$ | CCSD(T)/aug-cc-pCVQZ         | M06L/pcJ-2              | 319.58 | 0.18  | -0.35 | 0.32  | 319.74 |
| HCCH     | $^1J_{CH}$ | B3LYP/pc-2                   | B3LYP/pcJ-2             | 269.60 | 0.54  | -0.87 | 0.30  | 269.57 |
| HCCH     | $^1J_{CH}$ | B3LYP/pc-2                   | PBE0/pcJ-2              | 254.32 | 0.46  | -1.04 | 0.31  | 254.06 |
| HCCH     | $^1J_{CH}$ | B3LYP/pc-2                   | M06L/pcJ-2              | 316.76 | 0.20  | -0.29 | 0.33  | 317.00 |
| HCCH     | $^1J_{CH}$ | PBE0/pc-2                    | B3LYP/pcJ-2             | 270.16 | 0.54  | -0.85 | 0.30  | 270.14 |
| HCCH     | $^1J_{CH}$ | PBE0/pc-2                    | PBE0/pcJ-2              | 254.82 | 0.46  | -1.02 | 0.31  | 254.57 |
| HCCH     | $^1J_{CH}$ | PBE0/pc-2                    | M06L/pcJ-2              | 317.19 | 0.20  | -0.28 | 0.33  | 317.45 |
| HCCH     | $^1J_{CH}$ | PBE0/aug-pc-2                | PBE0/aug-pcJ-2          | 254.87 | 0.44  | -1.03 | 0.31  | 254.59 |
| HCCH     | $^1J_{CH}$ | PBE0/aug-pc-2                | M06L/aug-pcJ-2          | 316.64 | 0.21  | -0.29 | 0.33  | 316.89 |
| HCCH     | $^1J_{CH}$ | M06L/pc-2                    | B3LYP/pcJ-2             | 269.25 | 0.54  | -0.88 | 0.30  | 269.21 |
| HCCH     | $^1J_{CH}$ | M06L/pc-2                    | PBE0/pcJ-2              | 254.02 | 0.46  | -1.05 | 0.31  | 253.74 |
| HCCH     | $^1J_{CH}$ | M06L/pc-2                    | M06L/pcJ-2              | 316.49 | 0.20  | -0.30 | 0.33  | 316.72 |
| HCCH     | $^1J_{CH}$ | M06L/aug-pc-2                | PBE0/aug-pcJ-2          | 254.10 | 0.44  | -1.06 | 0.31  | 253.80 |
| HCCH     | $^1J_{CH}$ | M06L/aug-pc-2                | M06L/aug-pcJ-2          | 315.96 | 0.20  | -0.31 | 0.33  | 316.19 |
| HCCH     | $^2J_{CH}$ | CCSD(T)/aug-cc-pCVQZ         | B3LYP/pcJ-2             | 49.83  | 1.27  | 6.27  | -1.35 | 56.02  |
| HCCH     | $^2J_{CH}$ | CCSD(T)/aug-cc-pCVQZ         | PBE0/pcJ-2              | 47.12  | 1.35  | 6.28  | -1.35 | 53.40  |
| HCCH     | $^2J_{CH}$ | CCSD(T)/aug-cc-pCVQZ         | M06L/pcJ-2              | 39.87  | 1.53  | 5.57  | -1.35 | 45.63  |
| HCCH     | $^2J_{CH}$ | B3LYP/pc-2                   | B3LYP/pcJ-2             | 50.09  | 1.25  | 6.22  | -1.37 | 56.19  |
| HCCH     | $^2J_{CH}$ | B3LYP/pc-2                   | PBE0/pcJ-2              | 47.46  | 1.33  | 6.23  | -1.36 | 53.65  |
| HCCH     | $^2J_{CH}$ | B3LYP/pc-2                   | M06L/pcJ-2              | 40.45  | 1.50  | 5.54  | -1.36 | 46.13  |
| HCCH     | $^2J_{CH}$ | PBE0/pc-2                    | B3LYP/pcJ-2             | 50.17  | 1.24  | 6.19  | -1.36 | 56.23  |
| HCCH     | $^2J_{CH}$ | PBE0/pc-2                    | PBE0/pcJ-2              | 47.53  | 1.31  | 6.20  | -1.36 | 53.68  |
| HCCH     | $^2J_{CH}$ | PBE0/pc-2                    | M06L/pcJ-2              | 40.54  | 1.49  | 5.52  | -1.36 | 46.18  |
| HCCH     | $^2J_{CH}$ | PBE0/aug-pc-2                | PBE0/aug-pcJ-2          | 47.55  | 1.35  | 6.22  | -1.36 | 53.75  |
| HCCH     | $^2J_{CH}$ | PBE0/aug-pc-2                | M06L/aug-pcJ-2          | 40.67  | 1.49  | 5.54  | -1.36 | 46.34  |
| HCCH     | $^2J_{CH}$ | M06L/pc-2                    | B3LYP/pcJ-2             | 50.04  | 1.26  | 6.23  | -1.37 | 56.16  |
| HCCH     | $^2J_{CH}$ | M06L/pc-2                    | PBE0/pcJ-2              | 47.42  | 1.34  | 6.24  | -1.37 | 53.63  |
| HCCH     | $^2J_{CH}$ | M06L/pc-2                    | M06L/pcJ-2              | 40.40  | 1.51  | 5.56  | -1.37 | 46.10  |
| HCCH     | $^2J_{CH}$ | M06L/aug-pc-2                | PBE0/aug-pcJ-2          | 47.45  | 1.37  | 6.26  | -1.37 | 53.71  |
| HCCH     | $^2J_{CH}$ | M06L/aug-pc-2                | M06L/aug-pcJ-2          | 40.54  | 1.51  | 5.58  | -1.36 | 46.27  |
| HCCH     | $^3J_{HH}$ | CCSD(T)/aug-cc-pCVQZ         | B3LYP/pcJ-2             | 9.19   | 0.67  | 4.89  | -3.60 | 11.15  |

Continued on next page

(Continued)

| Molecule | Coupling   | Geometry optimization method | SSCC calculation method | FC     | SD    | PSO   | DSO   | Total  |
|----------|------------|------------------------------|-------------------------|--------|-------|-------|-------|--------|
| HCCH     | $^3J_{HH}$ | CCSD(T)/aug-cc-pCVQZ         | PBE0/pcJ-2              | 10.42  | 0.72  | 4.91  | -3.59 | 12.46  |
| HCCH     | $^3J_{HH}$ | CCSD(T)/aug-cc-pCVQZ         | M06L/pcJ-2              | 19.70  | 0.68  | 4.71  | -3.59 | 21.49  |
| HCCH     | $^3J_{HH}$ | B3LYP/pc-2                   | B3LYP/pcJ-2             | 8.83   | 0.65  | 4.90  | -3.63 | 10.75  |
| HCCH     | $^3J_{HH}$ | B3LYP/pc-2                   | PBE0/pcJ-2              | 10.03  | 0.70  | 4.92  | -3.62 | 12.03  |
| HCCH     | $^3J_{HH}$ | B3LYP/pc-2                   | M06L/pcJ-2              | 19.12  | 0.66  | 4.73  | -3.62 | 20.88  |
| HCCH     | $^3J_{HH}$ | PBE0/pc-2                    | B3LYP/pcJ-2             | 8.88   | 0.65  | 4.87  | -3.61 | 10.78  |
| HCCH     | $^3J_{HH}$ | PBE0/pc-2                    | PBE0/pcJ-2              | 10.07  | 0.70  | 4.89  | -3.60 | 12.05  |
| HCCH     | $^3J_{HH}$ | PBE0/pc-2                    | M06L/pcJ-2              | 19.15  | 0.66  | 4.70  | -3.61 | 20.90  |
| HCCH     | $^3J_{HH}$ | PBE0/aug-pc-2                | PBE0/aug-pcJ-2          | 10.06  | 0.70  | 4.94  | -3.60 | 12.09  |
| HCCH     | $^3J_{HH}$ | PBE0/aug-pc-2                | M06L/aug-pcJ-2          | 18.88  | 0.66  | 4.74  | -3.60 | 20.67  |
| HCCH     | $^3J_{HH}$ | M06L/pc-2                    | B3LYP/pcJ-2             | 8.81   | 0.65  | 4.91  | -3.64 | 10.74  |
| HCCH     | $^3J_{HH}$ | M06L/pc-2                    | PBE0/pcJ-2              | 10.00  | 0.70  | 4.94  | -3.63 | 12.02  |
| HCCH     | $^3J_{HH}$ | M06L/pc-2                    | M06L/pcJ-2              | 19.10  | 0.66  | 4.74  | -3.63 | 20.87  |
| HCCH     | $^3J_{HH}$ | M06L/aug-pc-2                | PBE0/aug-pcJ-2          | 9.99   | 0.71  | 4.99  | -3.63 | 12.06  |
| HCCH     | $^3J_{HH}$ | M06L/aug-pc-2                | M06L/aug-pcJ-2          | 18.82  | 0.67  | 4.78  | -3.63 | 20.64  |
| HCN      | $^1J_{CN}$ | CCSD(T)/aug-cc-pCVQZ         | B3LYP/pcJ-2             | -9.49  | -7.64 | -0.77 | 0.04  | -17.86 |
| HCN      | $^1J_{CN}$ | CCSD(T)/aug-cc-pCVQZ         | PBE0/pcJ-2              | -8.04  | -8.01 | -0.82 | 0.04  | -16.83 |
| HCN      | $^1J_{CN}$ | CCSD(T)/aug-cc-pCVQZ         | M06L/pcJ-2              | -18.48 | -7.88 | 0.09  | 0.03  | -26.23 |
| HCN      | $^1J_{CN}$ | B3LYP/pc-2                   | B3LYP/pcJ-2             | -11.69 | -7.32 | -0.62 | 0.04  | -19.59 |
| HCN      | $^1J_{CN}$ | B3LYP/pc-2                   | PBE0/pcJ-2              | -10.18 | -7.65 | -0.66 | 0.04  | -18.46 |
| HCN      | $^1J_{CN}$ | B3LYP/pc-2                   | M06L/pcJ-2              | -19.44 | -7.56 | 0.17  | 0.03  | -26.80 |
| HCN      | $^1J_{CN}$ | PBE0/pc-2                    | B3LYP/pcJ-2             | -11.72 | -7.30 | -0.62 | 0.04  | -19.60 |
| HCN      | $^1J_{CN}$ | PBE0/pc-2                    | PBE0/pcJ-2              | -10.21 | -7.63 | -0.67 | 0.04  | -18.47 |
| HCN      | $^1J_{CN}$ | PBE0/pc-2                    | M06L/pcJ-2              | -19.40 | -7.55 | 0.16  | 0.03  | -26.76 |
| HCN      | $^1J_{CN}$ | PBE0/aug-pc-2                | PBE0/aug-pcJ-2          | -10.31 | -7.65 | -0.68 | 0.04  | -18.61 |
| HCN      | $^1J_{CN}$ | PBE0/aug-pc-2                | M06L/aug-pcJ-2          | -19.44 | -7.51 | 0.18  | 0.03  | -26.73 |
| HCN      | $^1J_{CN}$ | M06L/pc-2                    | B3LYP/pcJ-2             | -11.10 | -7.40 | -0.66 | 0.04  | -19.12 |
| HCN      | $^1J_{CN}$ | M06L/pc-2                    | PBE0/pcJ-2              | -9.61  | -7.74 | -0.70 | 0.04  | -18.02 |
| HCN      | $^1J_{CN}$ | M06L/pc-2                    | M06L/pcJ-2              | -19.19 | -7.65 | 0.15  | 0.03  | -26.65 |
| HCN      | $^1J_{CN}$ | M06L/aug-pc-2                | PBE0/aug-pcJ-2          | -9.70  | -7.77 | -0.72 | 0.04  | -18.15 |
| HCN      | $^1J_{CN}$ | M06L/aug-pc-2                | M06L/aug-pcJ-2          | -19.21 | -7.61 | 0.17  | 0.03  | -26.62 |
| HCN      | $^1J_{CH}$ | CCSD(T)/aug-cc-pCVQZ         | B3LYP/pcJ-2             | 282.34 | 0.58  | -0.77 | 0.39  | 282.53 |
| HCN      | $^1J_{CH}$ | CCSD(T)/aug-cc-pCVQZ         | PBE0/pcJ-2              | 264.50 | 0.51  | -0.93 | 0.40  | 264.49 |
| HCN      | $^1J_{CH}$ | CCSD(T)/aug-cc-pCVQZ         | M06L/pcJ-2              | 324.79 | 0.32  | -0.19 | 0.42  | 325.34 |
| HCN      | $^1J_{CH}$ | B3LYP/pc-2                   | B3LYP/pcJ-2             | 280.23 | 0.58  | -0.68 | 0.41  | 280.54 |
| HCN      | $^1J_{CH}$ | B3LYP/pc-2                   | PBE0/pcJ-2              | 262.44 | 0.52  | -0.83 | 0.42  | 262.55 |
| HCN      | $^1J_{CH}$ | B3LYP/pc-2                   | M06L/pcJ-2              | 322.87 | 0.34  | -0.13 | 0.44  | 323.52 |
| HCN      | $^1J_{CH}$ | PBE0/pc-2                    | B3LYP/pcJ-2             | 280.51 | 0.58  | -0.66 | 0.41  | 280.83 |
| HCN      | $^1J_{CH}$ | PBE0/pc-2                    | PBE0/pcJ-2              | 262.65 | 0.52  | -0.81 | 0.42  | 262.78 |
| HCN      | $^1J_{CH}$ | PBE0/pc-2                    | M06L/pcJ-2              | 322.92 | 0.35  | -0.11 | 0.44  | 323.59 |
| HCN      | $^1J_{CH}$ | PBE0/aug-pc-2                | PBE0/aug-pcJ-2          | 262.92 | 0.49  | -0.82 | 0.42  | 263.01 |
| HCN      | $^1J_{CH}$ | PBE0/aug-pc-2                | M06L/aug-pcJ-2          | 323.03 | 0.35  | -0.13 | 0.44  | 323.69 |
| HCN      | $^1J_{CH}$ | M06L/pc-2                    | B3LYP/pcJ-2             | 280.70 | 0.58  | -0.71 | 0.40  | 280.97 |
| HCN      | $^1J_{CH}$ | M06L/pc-2                    | PBE0/pcJ-2              | 262.91 | 0.52  | -0.86 | 0.42  | 262.98 |
| HCN      | $^1J_{CH}$ | M06L/pc-2                    | M06L/pcJ-2              | 323.36 | 0.33  | -0.15 | 0.43  | 323.98 |
| HCN      | $^1J_{CH}$ | M06L/aug-pc-2                | PBE0/aug-pcJ-2          | 263.20 | 0.49  | -0.87 | 0.41  | 263.23 |
| HCN      | $^1J_{CH}$ | M06L/aug-pc-2                | M06L/aug-pcJ-2          | 323.48 | 0.33  | -0.16 | 0.43  | 324.09 |
| HCN      | $^2J_{NH}$ | CCSD(T)/aug-cc-pCVQZ         | B3LYP/pcJ-2             | -3.26  | -0.90 | -3.89 | 0.62  | -7.44  |
| HCN      | $^2J_{NH}$ | CCSD(T)/aug-cc-pCVQZ         | PBE0/pcJ-2              | -3.05  | -0.96 | -3.90 | 0.62  | -7.30  |

Continued on next page

(Continued)

| Molecule | Coupling          | Geometry optimization method | SSCC calculation method | FC      | SD    | PSO    | DSO   | Total   |
|----------|-------------------|------------------------------|-------------------------|---------|-------|--------|-------|---------|
| HCN      | $^2J_{\text{NH}}$ | CCSD(T)/aug-cc-pCVQZ         | M06L/pcJ-2              | 5.36    | -1.01 | -3.32  | 0.61  | 1.65    |
| HCN      | $^2J_{\text{NH}}$ | B3LYP/pc-2                   | B3LYP/pcJ-2             | -3.99   | -0.88 | -3.85  | 0.63  | -8.09   |
| HCN      | $^2J_{\text{NH}}$ | B3LYP/pc-2                   | PBE0/pcJ-2              | -3.76   | -0.93 | -3.85  | 0.63  | -7.92   |
| HCN      | $^2J_{\text{NH}}$ | B3LYP/pc-2                   | M06L/pcJ-2              | 4.53    | -0.98 | -3.30  | 0.63  | 0.89    |
| HCN      | $^2J_{\text{NH}}$ | PBE0/pc-2                    | B3LYP/pcJ-2             | -4.01   | -0.87 | -3.82  | 0.63  | -8.07   |
| HCN      | $^2J_{\text{NH}}$ | PBE0/pc-2                    | PBE0/pcJ-2              | -3.77   | -0.92 | -3.83  | 0.63  | -7.90   |
| HCN      | $^2J_{\text{NH}}$ | PBE0/pc-2                    | M06L/pcJ-2              | 4.51    | -0.97 | -3.28  | 0.63  | 0.89    |
| HCN      | $^2J_{\text{NH}}$ | PBE0/aug-pc-2                | PBE0/aug-pcJ-2          | -3.77   | -0.94 | -3.83  | 0.63  | -7.92   |
| HCN      | $^2J_{\text{NH}}$ | PBE0/aug-pc-2                | M06L/aug-pcJ-2          | 4.52    | -0.97 | -3.28  | 0.63  | 0.90    |
| HCN      | $^2J_{\text{NH}}$ | M06L/pc-2                    | B3LYP/pcJ-2             | -3.80   | -0.89 | -3.86  | 0.63  | -7.92   |
| HCN      | $^2J_{\text{NH}}$ | M06L/pc-2                    | PBE0/pcJ-2              | -3.57   | -0.95 | -3.87  | 0.63  | -7.76   |
| HCN      | $^2J_{\text{NH}}$ | M06L/pc-2                    | M06L/pcJ-2              | 4.76    | -0.99 | -3.31  | 0.62  | 1.09    |
| HCN      | $^2J_{\text{NH}}$ | M06L/aug-pc-2                | PBE0/aug-pcJ-2          | -3.56   | -0.96 | -3.88  | 0.63  | -7.77   |
| HCN      | $^2J_{\text{NH}}$ | M06L/aug-pc-2                | M06L/aug-pcJ-2          | 4.78    | -0.99 | -3.31  | 0.62  | 1.10    |
| HFCO     | $^1J_{\text{CO}}$ | CCSD(T)/aug-cc-pCVQZ         | B3LYP/pcJ-2             | 14.27   | -4.61 | 12.74  | -0.05 | 22.34   |
| HFCO     | $^1J_{\text{CO}}$ | CCSD(T)/aug-cc-pCVQZ         | PBE0/pcJ-2              | 14.51   | -4.81 | 12.54  | -0.05 | 22.18   |
| HFCO     | $^1J_{\text{CO}}$ | CCSD(T)/aug-cc-pCVQZ         | M06L/pcJ-2              | 0.21    | -4.26 | 10.98  | -0.06 | 6.88    |
| HFCO     | $^1J_{\text{CO}}$ | B3LYP/pc-2                   | B3LYP/pcJ-2             | 13.98   | -4.65 | 12.57  | -0.05 | 21.85   |
| HFCO     | $^1J_{\text{CO}}$ | B3LYP/pc-2                   | PBE0/pcJ-2              | 14.23   | -4.84 | 12.37  | -0.05 | 21.70   |
| HFCO     | $^1J_{\text{CO}}$ | B3LYP/pc-2                   | M06L/pcJ-2              | 0.21    | -4.26 | 10.98  | -0.06 | 6.88    |
| HFCO     | $^1J_{\text{CO}}$ | PBE0/pc-2                    | B3LYP/pcJ-2             | 13.11   | -4.53 | 12.61  | -0.05 | 21.13   |
| HFCO     | $^1J_{\text{CO}}$ | PBE0/pc-2                    | PBE0/pcJ-2              | 13.39   | -4.72 | 12.41  | -0.05 | 21.03   |
| HFCO     | $^1J_{\text{CO}}$ | PBE0/pc-2                    | M06L/pcJ-2              | -0.36   | -4.19 | 10.89  | -0.06 | 6.28    |
| HFCO     | $^1J_{\text{CO}}$ | PBE0/aug-pc-2                | PBE0/aug-pcJ-2          | 13.31   | -4.72 | 12.41  | -0.05 | 20.95   |
| HFCO     | $^1J_{\text{CO}}$ | PBE0/aug-pc-2                | M06L/aug-pcJ-2          | -0.31   | -4.17 | 10.89  | -0.06 | 6.36    |
| HFCO     | $^1J_{\text{CO}}$ | M06L/pc-2                    | B3LYP/pcJ-2             | 13.76   | -4.57 | 12.59  | -0.05 | 21.73   |
| HFCO     | $^1J_{\text{CO}}$ | M06L/pc-2                    | PBE0/pcJ-2              | 14.02   | -4.76 | 12.40  | -0.05 | 21.60   |
| HFCO     | $^1J_{\text{CO}}$ | M06L/pc-2                    | M06L/pcJ-2              | 0.03    | -4.22 | 10.87  | -0.06 | 6.62    |
| HFCO     | $^1J_{\text{CO}}$ | M06L/aug-pc-2                | PBE0/aug-pcJ-2          | 13.96   | -4.76 | 12.39  | -0.05 | 21.54   |
| HFCO     | $^1J_{\text{CO}}$ | M06L/aug-pc-2                | M06L/aug-pcJ-2          | 0.09    | -4.20 | 10.87  | -0.06 | 6.71    |
| HFCO     | $^1J_{\text{CF}}$ | CCSD(T)/aug-cc-pCVQZ         | B3LYP/pcJ-2             | -393.11 | -1.04 | -52.02 | 0.71  | -445.45 |
| HFCO     | $^1J_{\text{CF}}$ | CCSD(T)/aug-cc-pCVQZ         | PBE0/pcJ-2              | -382.74 | -1.71 | -50.74 | 0.71  | -434.47 |
| HFCO     | $^1J_{\text{CF}}$ | CCSD(T)/aug-cc-pCVQZ         | M06L/pcJ-2              | -313.10 | -1.36 | -47.96 | 0.72  | -361.71 |
| HFCO     | $^1J_{\text{CF}}$ | B3LYP/pc-2                   | B3LYP/pcJ-2             | -396.78 | -0.48 | -51.01 | 0.71  | -447.55 |
| HFCO     | $^1J_{\text{CF}}$ | B3LYP/pc-2                   | PBE0/pcJ-2              | -386.23 | -1.11 | -49.71 | 0.71  | -436.33 |
| HFCO     | $^1J_{\text{CF}}$ | B3LYP/pc-2                   | M06L/pcJ-2              | -317.24 | -0.87 | -47.21 | 0.72  | -364.61 |
| HFCO     | $^1J_{\text{CF}}$ | PBE0/pc-2                    | B3LYP/pcJ-2             | -392.40 | -1.04 | -51.85 | 0.72  | -444.56 |
| HFCO     | $^1J_{\text{CF}}$ | PBE0/pc-2                    | PBE0/pcJ-2              | -382.04 | -1.69 | -50.58 | 0.72  | -433.58 |
| HFCO     | $^1J_{\text{CF}}$ | PBE0/pc-2                    | M06L/pcJ-2              | -312.10 | -1.36 | -47.81 | 0.72  | -360.55 |
| HFCO     | $^1J_{\text{CF}}$ | PBE0/aug-pc-2                | PBE0/aug-pcJ-2          | -381.94 | -1.62 | -50.69 | 0.72  | -433.53 |
| HFCO     | $^1J_{\text{CF}}$ | PBE0/aug-pc-2                | M06L/aug-pcJ-2          | -312.73 | -1.30 | -47.88 | 0.72  | -361.18 |
| HFCO     | $^1J_{\text{CF}}$ | M06L/pc-2                    | B3LYP/pcJ-2             | -394.14 | -0.98 | -51.86 | 0.72  | -446.26 |
| HFCO     | $^1J_{\text{CF}}$ | M06L/pc-2                    | PBE0/pcJ-2              | -383.72 | -1.63 | -50.58 | 0.72  | -435.21 |
| HFCO     | $^1J_{\text{CF}}$ | M06L/pc-2                    | M06L/pcJ-2              | -313.82 | -1.31 | -47.84 | 0.72  | -362.26 |
| HFCO     | $^1J_{\text{CF}}$ | M06L/aug-pc-2                | PBE0/aug-pcJ-2          | -383.60 | -1.55 | -50.69 | 0.72  | -435.13 |
| HFCO     | $^1J_{\text{CF}}$ | M06L/aug-pc-2                | M06L/aug-pcJ-2          | -314.44 | -1.24 | -47.91 | 0.72  | -362.87 |
| HFCO     | $^1J_{\text{CH}}$ | CCSD(T)/aug-cc-pCVQZ         | B3LYP/pcJ-2             | 265.93  | 0.64  | -0.85  | 1.17  | 266.88  |
| HFCO     | $^1J_{\text{CH}}$ | CCSD(T)/aug-cc-pCVQZ         | PBE0/pcJ-2              | 250.45  | 0.64  | -0.92  | 1.19  | 251.36  |
| HFCO     | $^1J_{\text{CH}}$ | CCSD(T)/aug-cc-pCVQZ         | M06L/pcJ-2              | 303.63  | 0.61  | -0.73  | 1.21  | 304.71  |

Continued on next page

(Continued)

| Molecule | Coupling   | Geometry optimization method | SSCC calculation method | FC     | SD    | PSO   | DSO   | Total  |
|----------|------------|------------------------------|-------------------------|--------|-------|-------|-------|--------|
| HFCO     | $^1J_{CH}$ | B3LYP/pc-2                   | B3LYP/pcJ-2             | 268.67 | 0.63  | -0.84 | 1.16  | 269.63 |
| HFCO     | $^1J_{CH}$ | B3LYP/pc-2                   | PBE0/pcJ-2              | 252.93 | 0.63  | -0.90 | 1.17  | 253.84 |
| HFCO     | $^1J_{CH}$ | B3LYP/pc-2                   | M06L/pcJ-2              | 305.86 | 0.61  | -0.71 | 1.19  | 306.95 |
| HFCO     | $^1J_{CH}$ | PBE0/pc-2                    | B3LYP/pcJ-2             | 265.02 | 0.61  | -0.84 | 1.18  | 265.98 |
| HFCO     | $^1J_{CH}$ | PBE0/pc-2                    | PBE0/pcJ-2              | 249.49 | 0.61  | -0.90 | 1.20  | 250.40 |
| HFCO     | $^1J_{CH}$ | PBE0/pc-2                    | M06L/pcJ-2              | 301.43 | 0.59  | -0.72 | 1.22  | 302.51 |
| HFCO     | $^1J_{CH}$ | PBE0/aug-pc-2                | PBE0/aug-pcJ-2          | 250.11 | 0.61  | -0.94 | 1.20  | 250.97 |
| HFCO     | $^1J_{CH}$ | PBE0/aug-pc-2                | M06L/aug-pcJ-2          | 302.61 | 0.59  | -0.76 | 1.21  | 303.65 |
| HFCO     | $^1J_{CH}$ | M06L/pc-2                    | B3LYP/pcJ-2             | 265.84 | 0.62  | -0.84 | 1.18  | 266.80 |
| HFCO     | $^1J_{CH}$ | M06L/pc-2                    | PBE0/pcJ-2              | 250.25 | 0.62  | -0.90 | 1.19  | 251.16 |
| HFCO     | $^1J_{CH}$ | M06L/pc-2                    | M06L/pcJ-2              | 302.25 | 0.59  | -0.71 | 1.21  | 303.33 |
| HFCO     | $^1J_{CH}$ | M06L/aug-pc-2                | PBE0/aug-pcJ-2          | 250.89 | 0.61  | -0.94 | 1.19  | 251.76 |
| HFCO     | $^1J_{CH}$ | M06L/aug-pc-2                | M06L/aug-pcJ-2          | 303.48 | 0.60  | -0.75 | 1.20  | 304.53 |
| HFCO     | $^2J_{OF}$ | CCSD(T)/aug-cc-pCVQZ         | B3LYP/pcJ-2             | -7.27  | -4.20 | 83.13 | 0.33  | 72.00  |
| HFCO     | $^2J_{OF}$ | CCSD(T)/aug-cc-pCVQZ         | PBE0/pcJ-2              | -8.49  | -4.41 | 82.86 | 0.33  | 70.30  |
| HFCO     | $^2J_{OF}$ | CCSD(T)/aug-cc-pCVQZ         | M06L/pcJ-2              | -28.88 | -4.04 | 68.00 | 0.33  | 35.42  |
| HFCO     | $^2J_{OF}$ | B3LYP/pc-2                   | B3LYP/pcJ-2             | -6.99  | -3.99 | 82.99 | 0.33  | 72.34  |
| HFCO     | $^2J_{OF}$ | B3LYP/pc-2                   | PBE0/pcJ-2              | -8.20  | -4.18 | 82.70 | 0.33  | 70.65  |
| HFCO     | $^2J_{OF}$ | B3LYP/pc-2                   | M06L/pcJ-2              | -28.63 | -3.90 | 67.79 | 0.33  | 35.60  |
| HFCO     | $^2J_{OF}$ | PBE0/pc-2                    | B3LYP/pcJ-2             | -7.04  | -4.10 | 82.05 | 0.34  | 71.24  |
| HFCO     | $^2J_{OF}$ | PBE0/pc-2                    | PBE0/pcJ-2              | -8.27  | -4.28 | 81.79 | 0.34  | 69.57  |
| HFCO     | $^2J_{OF}$ | PBE0/pc-2                    | M06L/pcJ-2              | -28.47 | -3.96 | 67.18 | 0.34  | 35.10  |
| HFCO     | $^2J_{OF}$ | PBE0/aug-pc-2                | PBE0/aug-pcJ-2          | -8.17  | -4.21 | 81.24 | 0.34  | 69.19  |
| HFCO     | $^2J_{OF}$ | PBE0/aug-pc-2                | M06L/aug-pcJ-2          | -27.92 | -3.92 | 66.88 | 0.34  | 35.38  |
| HFCO     | $^2J_{OF}$ | M06L/pc-2                    | B3LYP/pcJ-2             | -6.75  | -4.09 | 82.18 | 0.34  | 71.67  |
| HFCO     | $^2J_{OF}$ | M06L/pc-2                    | PBE0/pcJ-2              | -7.98  | -4.28 | 81.92 | 0.34  | 69.99  |
| HFCO     | $^2J_{OF}$ | M06L/pc-2                    | M06L/pcJ-2              | -28.25 | -3.96 | 67.26 | 0.34  | 35.39  |
| HFCO     | $^2J_{OF}$ | M06L/aug-pc-2                | PBE0/aug-pcJ-2          | -7.89  | -4.22 | 81.39 | 0.34  | 69.62  |
| HFCO     | $^2J_{OF}$ | M06L/aug-pc-2                | M06L/aug-pcJ-2          | -27.71 | -3.93 | 66.98 | 0.34  | 35.68  |
| HFCO     | $^2J_{OH}$ | CCSD(T)/aug-cc-pCVQZ         | B3LYP/pcJ-2             | -10.83 | -0.76 | 0.59  | 0.52  | -10.49 |
| HFCO     | $^2J_{OH}$ | CCSD(T)/aug-cc-pCVQZ         | PBE0/pcJ-2              | -10.08 | -0.82 | 0.58  | 0.52  | -9.80  |
| HFCO     | $^2J_{OH}$ | CCSD(T)/aug-cc-pCVQZ         | M06L/pcJ-2              | -7.82  | -0.55 | 0.56  | 0.51  | -7.30  |
| HFCO     | $^2J_{OH}$ | B3LYP/pc-2                   | B3LYP/pcJ-2             | -10.85 | -0.76 | 0.53  | 0.52  | -10.56 |
| HFCO     | $^2J_{OH}$ | B3LYP/pc-2                   | PBE0/pcJ-2              | -10.10 | -0.81 | 0.53  | 0.52  | -9.87  |
| HFCO     | $^2J_{OH}$ | B3LYP/pc-2                   | M06L/pcJ-2              | -7.85  | -0.55 | 0.51  | 0.52  | -7.38  |
| HFCO     | $^2J_{OH}$ | PBE0/pc-2                    | B3LYP/pcJ-2             | -11.13 | -0.74 | 0.58  | 0.52  | -10.78 |
| HFCO     | $^2J_{OH}$ | PBE0/pc-2                    | PBE0/pcJ-2              | -10.37 | -0.79 | 0.57  | 0.52  | -10.07 |
| HFCO     | $^2J_{OH}$ | PBE0/pc-2                    | M06L/pcJ-2              | -8.18  | -0.53 | 0.54  | 0.51  | -7.65  |
| HFCO     | $^2J_{OH}$ | PBE0/aug-pc-2                | PBE0/aug-pcJ-2          | -10.35 | -0.79 | 0.59  | 0.52  | -10.04 |
| HFCO     | $^2J_{OH}$ | PBE0/aug-pc-2                | M06L/aug-pcJ-2          | -8.23  | -0.54 | 0.56  | 0.51  | -7.69  |
| HFCO     | $^2J_{OH}$ | M06L/pc-2                    | B3LYP/pcJ-2             | -11.08 | -0.74 | 0.56  | 0.52  | -10.75 |
| HFCO     | $^2J_{OH}$ | M06L/pc-2                    | PBE0/pcJ-2              | -10.32 | -0.79 | 0.55  | 0.52  | -10.05 |
| HFCO     | $^2J_{OH}$ | M06L/pc-2                    | M06L/pcJ-2              | -8.15  | -0.53 | 0.53  | 0.51  | -7.63  |
| HFCO     | $^2J_{OH}$ | M06L/aug-pc-2                | PBE0/aug-pcJ-2          | -10.30 | -0.80 | 0.58  | 0.51  | -10.01 |
| HFCO     | $^2J_{OH}$ | M06L/aug-pc-2                | M06L/aug-pcJ-2          | -8.19  | -0.54 | 0.54  | 0.51  | -7.67  |
| HFCO     | $^2J_{FH}$ | CCSD(T)/aug-cc-pCVQZ         | B3LYP/pcJ-2             | 206.18 | -1.31 | -4.97 | -1.85 | 198.06 |
| HFCO     | $^2J_{FH}$ | CCSD(T)/aug-cc-pCVQZ         | PBE0/pcJ-2              | 195.04 | -1.49 | -4.83 | -1.84 | 186.88 |
| HFCO     | $^2J_{FH}$ | CCSD(T)/aug-cc-pCVQZ         | M06L/pcJ-2              | 233.27 | -1.50 | -5.17 | -1.84 | 224.76 |
| HFCO     | $^2J_{FH}$ | B3LYP/pc-2                   | B3LYP/pcJ-2             | 207.23 | -1.41 | -5.15 | -1.78 | 198.89 |

Continued on next page

(Continued)

| Molecule        | Coupling   | Geometry optimization method | SSCC calculation method | FC     | SD      | PSO     | DSO   | Total   |
|-----------------|------------|------------------------------|-------------------------|--------|---------|---------|-------|---------|
| HFCO            | $^2J_{FH}$ | B3LYP/pc-2                   | PBE0/pcJ-2              | 195.99 | -1.59   | -5.00   | -1.78 | 187.62  |
| HFCO            | $^2J_{FH}$ | B3LYP/pc-2                   | M06L/pcJ-2              | 235.27 | -1.57   | -5.34   | -1.78 | 226.58  |
| HFCO            | $^2J_{FH}$ | PBE0/pc-2                    | B3LYP/pcJ-2             | 209.75 | -1.27   | -4.99   | -1.83 | 201.66  |
| HFCO            | $^2J_{FH}$ | PBE0/pc-2                    | PBE0/pcJ-2              | 198.27 | -1.45   | -4.85   | -1.82 | 190.16  |
| HFCO            | $^2J_{FH}$ | PBE0/pc-2                    | M06L/pcJ-2              | 235.68 | -1.47   | -5.18   | -1.82 | 227.21  |
| HFCO            | $^2J_{FH}$ | PBE0/aug-pc-2                | PBE0/aug-pcJ-2          | 197.98 | -1.38   | -5.20   | -1.83 | 189.57  |
| HFCO            | $^2J_{FH}$ | PBE0/aug-pc-2                | M06L/aug-pcJ-2          | 236.64 | -1.44   | -5.45   | -1.82 | 227.92  |
| HFCO            | $^2J_{FH}$ | M06L/pc-2                    | B3LYP/pcJ-2             | 209.46 | -1.29   | -5.12   | -1.80 | 201.24  |
| HFCO            | $^2J_{FH}$ | M06L/pc-2                    | PBE0/pcJ-2              | 197.98 | -1.47   | -4.97   | -1.80 | 189.74  |
| HFCO            | $^2J_{FH}$ | M06L/pc-2                    | M06L/pcJ-2              | 235.54 | -1.48   | -5.31   | -1.80 | 226.96  |
| HFCO            | $^2J_{FH}$ | M06L/aug-pc-2                | PBE0/aug-pcJ-2          | 197.61 | -1.40   | -5.33   | -1.80 | 189.07  |
| HFCO            | $^2J_{FH}$ | M06L/aug-pc-2                | M06L/aug-pcJ-2          | 236.42 | -1.46   | -5.59   | -1.80 | 227.58  |
| OH <sub>2</sub> | $^1J_{OF}$ | CCSD(T)/aug-cc-pCVQZ         | B3LYP/pcJ-2             | 145.56 | -210.77 | -257.22 | -0.40 | -322.82 |
| OH <sub>2</sub> | $^1J_{OF}$ | CCSD(T)/aug-cc-pCVQZ         | PBE0/pcJ-2              | 139.27 | -220.69 | -263.20 | -0.40 | -345.01 |
| OH <sub>2</sub> | $^1J_{OF}$ | CCSD(T)/aug-cc-pCVQZ         | M06L/pcJ-2              | 223.06 | -183.03 | -167.37 | -0.40 | -127.72 |
| OH <sub>2</sub> | $^1J_{OF}$ | B3LYP/pc-2                   | B3LYP/pcJ-2             | 145.95 | -209.79 | -254.87 | -0.40 | -319.10 |
| OH <sub>2</sub> | $^1J_{OF}$ | B3LYP/pc-2                   | PBE0/pcJ-2              | 139.58 | -219.70 | -260.90 | -0.40 | -341.41 |
| OH <sub>2</sub> | $^1J_{OF}$ | B3LYP/pc-2                   | M06L/pcJ-2              | 225.12 | -181.95 | -165.33 | -0.39 | -122.55 |
| OH <sub>2</sub> | $^1J_{OF}$ | PBE0/pc-2                    | B3LYP/pcJ-2             | 188.27 | -188.41 | -240.75 | -0.42 | -241.31 |
| OH <sub>2</sub> | $^1J_{OF}$ | PBE0/pc-2                    | PBE0/pcJ-2              | 182.08 | -195.85 | -245.60 | -0.41 | -259.78 |
| OH <sub>2</sub> | $^1J_{OF}$ | PBE0/pc-2                    | M06L/pcJ-2              | 250.16 | -163.93 | -159.51 | -0.41 | -73.69  |
| OH <sub>2</sub> | $^1J_{OF}$ | PBE0/aug-pc-2                | PBE0/aug-pcJ-2          | 183.54 | -194.53 | -244.04 | -0.42 | -255.45 |
| OH <sub>2</sub> | $^1J_{OF}$ | PBE0/aug-pc-2                | M06L/aug-pcJ-2          | 251.78 | -163.29 | -158.97 | -0.42 | -70.90  |
| OH <sub>2</sub> | $^1J_{OF}$ | M06L/pc-2                    | B3LYP/pcJ-2             | 146.04 | -209.64 | -254.53 | -0.40 | -318.53 |
| OH <sub>2</sub> | $^1J_{OF}$ | M06L/pc-2                    | PBE0/pcJ-2              | 139.66 | -219.54 | -260.57 | -0.40 | -340.85 |
| OH <sub>2</sub> | $^1J_{OF}$ | M06L/pc-2                    | M06L/pcJ-2              | 225.43 | -181.78 | -165.05 | -0.39 | -121.80 |
| OH <sub>2</sub> | $^1J_{OF}$ | M06L/aug-pc-2                | PBE0/aug-pcJ-2          | 140.49 | -219.04 | -259.60 | -0.40 | -338.55 |
| OH <sub>2</sub> | $^1J_{OF}$ | M06L/aug-pc-2                | M06L/aug-pcJ-2          | 226.54 | -181.81 | -164.75 | -0.40 | -120.42 |
| OH <sub>2</sub> | $^2J_{FF}$ | CCSD(T)/aug-cc-pCVQZ         | B3LYP/pcJ-2             | 29.87  | 711.08  | 1074.37 | -1.01 | 1814.31 |
| OH <sub>2</sub> | $^2J_{FF}$ | CCSD(T)/aug-cc-pCVQZ         | PBE0/pcJ-2              | 24.61  | 717.54  | 1059.20 | -1.01 | 1800.34 |
| OH <sub>2</sub> | $^2J_{FF}$ | CCSD(T)/aug-cc-pCVQZ         | M06L/pcJ-2              | 190.47 | 641.56  | 802.92  | -1.01 | 1633.94 |
| OH <sub>2</sub> | $^2J_{FF}$ | B3LYP/pc-2                   | B3LYP/pcJ-2             | 30.08  | 726.80  | 1107.20 | -1.04 | 1863.02 |
| OH <sub>2</sub> | $^2J_{FF}$ | B3LYP/pc-2                   | PBE0/pcJ-2              | 24.86  | 734.20  | 1091.56 | -1.05 | 1849.56 |
| OH <sub>2</sub> | $^2J_{FF}$ | B3LYP/pc-2                   | M06L/pcJ-2              | 188.81 | 655.17  | 826.10  | -1.05 | 1669.04 |
| OH <sub>2</sub> | $^2J_{FF}$ | PBE0/pc-2                    | B3LYP/pcJ-2             | 36.43  | 645.67  | 1022.82 | -1.12 | 1703.79 |
| OH <sub>2</sub> | $^2J_{FF}$ | PBE0/pc-2                    | PBE0/pcJ-2              | 33.25  | 649.28  | 1008.98 | -1.12 | 1690.39 |
| OH <sub>2</sub> | $^2J_{FF}$ | PBE0/pc-2                    | M06L/pcJ-2              | 188.85 | 583.99  | 772.18  | -1.12 | 1543.90 |
| OH <sub>2</sub> | $^2J_{FF}$ | PBE0/aug-pc-2                | PBE0/aug-pcJ-2          | 33.28  | 642.59  | 991.24  | -1.13 | 1665.98 |
| OH <sub>2</sub> | $^2J_{FF}$ | PBE0/aug-pc-2                | M06L/aug-pcJ-2          | 187.28 | 583.54  | 766.48  | -1.13 | 1536.17 |
| OH <sub>2</sub> | $^2J_{FF}$ | M06L/pc-2                    | B3LYP/pcJ-2             | 30.17  | 728.89  | 1111.68 | -1.05 | 1869.69 |
| OH <sub>2</sub> | $^2J_{FF}$ | M06L/pc-2                    | PBE0/pcJ-2              | 24.96  | 736.42  | 1095.98 | -1.06 | 1856.30 |
| OH <sub>2</sub> | $^2J_{FF}$ | M06L/pc-2                    | M06L/pcJ-2              | 188.64 | 656.98  | 829.26  | -1.05 | 1673.82 |
| OH <sub>2</sub> | $^2J_{FF}$ | M06L/aug-pc-2                | PBE0/aug-pcJ-2          | 25.65  | 732.95  | 1082.41 | -1.06 | 1839.95 |
| OH <sub>2</sub> | $^2J_{FF}$ | M06L/aug-pc-2                | M06L/aug-pcJ-2          | 187.45 | 660.00  | 826.98  | -1.06 | 1673.37 |
| OHF             | $^1J_{OF}$ | CCSD(T)/aug-cc-pCVQZ         | B3LYP/pcJ-2             | 131.92 | -314.36 | -552.08 | -0.26 | -734.78 |
| OHF             | $^1J_{OF}$ | CCSD(T)/aug-cc-pCVQZ         | PBE0/pcJ-2              | 127.38 | -325.52 | -548.79 | -0.26 | -747.19 |
| OHF             | $^1J_{OF}$ | CCSD(T)/aug-cc-pCVQZ         | M06L/pcJ-2              | 193.13 | -284.74 | -387.75 | -0.26 | -479.61 |
| OHF             | $^1J_{OF}$ | B3LYP/pc-2                   | B3LYP/pcJ-2             | 137.69 | -309.96 | -546.71 | -0.26 | -719.25 |
| OHF             | $^1J_{OF}$ | B3LYP/pc-2                   | PBE0/pcJ-2              | 133.13 | -320.70 | -543.36 | -0.26 | -731.19 |

Continued on next page

(Continued)

| Molecule | Coupling          | Geometry optimization method | SSCC calculation method | FC     | SD      | PSO     | DSO   | Total   |
|----------|-------------------|------------------------------|-------------------------|--------|---------|---------|-------|---------|
| OHF      | $^1J_{\text{OF}}$ | B3LYP/pc-2                   | M06L/pcJ-2              | 197.83 | -280.61 | -384.31 | -0.26 | -467.35 |
| OHF      | $^1J_{\text{OF}}$ | PBE0/pc-2                    | B3LYP/pcJ-2             | 170.52 | -277.90 | -513.32 | -0.27 | -620.97 |
| OHF      | $^1J_{\text{OF}}$ | PBE0/pc-2                    | PBE0/pcJ-2              | 166.21 | -285.50 | -509.37 | -0.27 | -628.93 |
| OHF      | $^1J_{\text{OF}}$ | PBE0/pc-2                    | M06L/pcJ-2              | 219.08 | -251.12 | -365.16 | -0.27 | -397.47 |
| OHF      | $^1J_{\text{OF}}$ | PBE0/aug-pc-2                | PBE0/aug-pcJ-2          | 167.50 | -284.88 | -508.21 | -0.27 | -625.86 |
| OHF      | $^1J_{\text{OF}}$ | PBE0/aug-pc-2                | M06L/aug-pcJ-2          | 219.64 | -251.22 | -365.83 | -0.27 | -397.67 |
| OHF      | $^1J_{\text{OF}}$ | M06L/pc-2                    | B3LYP/pcJ-2             | 133.77 | -313.69 | -551.04 | -0.26 | -731.23 |
| OHF      | $^1J_{\text{OF}}$ | M06L/pc-2                    | PBE0/pcJ-2              | 129.19 | -324.81 | -547.74 | -0.26 | -743.62 |
| OHF      | $^1J_{\text{OF}}$ | M06L/pc-2                    | M06L/pcJ-2              | 194.83 | -284.13 | -387.04 | -0.26 | -476.61 |
| OHF      | $^1J_{\text{OF}}$ | M06L/aug-pc-2                | PBE0/aug-pcJ-2          | 130.13 | -324.61 | -547.24 | -0.26 | -741.98 |
| OHF      | $^1J_{\text{OF}}$ | M06L/aug-pc-2                | M06L/aug-pcJ-2          | 194.89 | -284.69 | -388.26 | -0.26 | -478.32 |
| OHF      | $^1J_{\text{OH}}$ | CCSD(T)/aug-cc-pCVQZ         | B3LYP/pcJ-2             | -41.50 | 1.67    | 6.51    | -0.11 | -33.43  |
| OHF      | $^1J_{\text{OH}}$ | CCSD(T)/aug-cc-pCVQZ         | PBE0/pcJ-2              | -39.67 | 1.87    | 6.73    | -0.11 | -31.18  |
| OHF      | $^1J_{\text{OH}}$ | CCSD(T)/aug-cc-pCVQZ         | M06L/pcJ-2              | -68.82 | 1.54    | 3.92    | -0.12 | -63.48  |
| OHF      | $^1J_{\text{OH}}$ | B3LYP/pc-2                   | B3LYP/pcJ-2             | -40.14 | 1.65    | 6.17    | -0.11 | -32.43  |
| OHF      | $^1J_{\text{OH}}$ | B3LYP/pc-2                   | PBE0/pcJ-2              | -38.39 | 1.85    | 6.39    | -0.11 | -30.26  |
| OHF      | $^1J_{\text{OH}}$ | B3LYP/pc-2                   | M06L/pcJ-2              | -67.82 | 1.52    | 3.67    | -0.12 | -62.75  |
| OHF      | $^1J_{\text{OH}}$ | PBE0/pc-2                    | B3LYP/pcJ-2             | -42.75 | 1.44    | 4.58    | -0.13 | -36.86  |
| OHF      | $^1J_{\text{OH}}$ | PBE0/pc-2                    | PBE0/pcJ-2              | -40.96 | 1.63    | 4.78    | -0.14 | -34.69  |
| OHF      | $^1J_{\text{OH}}$ | PBE0/pc-2                    | M06L/pcJ-2              | -69.56 | 1.35    | 2.55    | -0.14 | -65.81  |
| OHF      | $^1J_{\text{OH}}$ | PBE0/aug-pc-2                | PBE0/aug-pcJ-2          | -42.06 | 1.58    | 4.84    | -0.14 | -35.77  |
| OHF      | $^1J_{\text{OH}}$ | PBE0/aug-pc-2                | M06L/aug-pcJ-2          | -70.21 | 1.32    | 2.58    | -0.14 | -66.46  |
| OHF      | $^1J_{\text{OH}}$ | M06L/pc-2                    | B3LYP/pcJ-2             | -41.83 | 1.67    | 6.54    | -0.11 | -33.73  |
| OHF      | $^1J_{\text{OH}}$ | M06L/pc-2                    | PBE0/pcJ-2              | -39.98 | 1.87    | 6.77    | -0.11 | -31.46  |
| OHF      | $^1J_{\text{OH}}$ | M06L/pc-2                    | M06L/pcJ-2              | -68.96 | 1.54    | 3.94    | -0.12 | -63.59  |
| OHF      | $^1J_{\text{OH}}$ | M06L/aug-pc-2                | PBE0/aug-pcJ-2          | -41.19 | 1.83    | 6.85    | -0.11 | -32.61  |
| OHF      | $^1J_{\text{OH}}$ | M06L/aug-pc-2                | M06L/aug-pcJ-2          | -69.72 | 1.52    | 3.99    | -0.11 | -64.32  |
| OHF      | $^2J_{\text{FH}}$ | CCSD(T)/aug-cc-pCVQZ         | B3LYP/pcJ-2             | 33.19  | -6.73   | 89.53   | -1.98 | 114.02  |
| OHF      | $^2J_{\text{FH}}$ | CCSD(T)/aug-cc-pCVQZ         | PBE0/pcJ-2              | 34.18  | -6.74   | 90.23   | -1.99 | 115.69  |
| OHF      | $^2J_{\text{FH}}$ | CCSD(T)/aug-cc-pCVQZ         | M06L/pcJ-2              | 14.18  | -6.99   | 69.23   | -1.98 | 74.44   |
| OHF      | $^2J_{\text{FH}}$ | B3LYP/pc-2                   | B3LYP/pcJ-2             | 32.53  | -6.73   | 88.62   | -2.03 | 112.39  |
| OHF      | $^2J_{\text{FH}}$ | B3LYP/pc-2                   | PBE0/pcJ-2              | 33.52  | -6.76   | 89.27   | -2.04 | 113.99  |
| OHF      | $^2J_{\text{FH}}$ | B3LYP/pc-2                   | M06L/pcJ-2              | 13.94  | -6.96   | 68.68   | -2.03 | 73.63   |
| OHF      | $^2J_{\text{FH}}$ | PBE0/pc-2                    | B3LYP/pcJ-2             | 32.83  | -6.60   | 84.51   | -2.17 | 108.57  |
| OHF      | $^2J_{\text{FH}}$ | PBE0/pc-2                    | PBE0/pcJ-2              | 33.51  | -6.63   | 84.99   | -2.18 | 109.69  |
| OHF      | $^2J_{\text{FH}}$ | PBE0/pc-2                    | M06L/pcJ-2              | 16.58  | -6.61   | 66.54   | -2.17 | 74.34   |
| OHF      | $^2J_{\text{FH}}$ | PBE0/aug-pc-2                | PBE0/aug-pcJ-2          | 32.32  | -6.39   | 84.38   | -2.19 | 108.12  |
| OHF      | $^2J_{\text{FH}}$ | PBE0/aug-pc-2                | M06L/aug-pcJ-2          | 15.80  | -6.53   | 66.23   | -2.18 | 73.32   |
| OHF      | $^2J_{\text{FH}}$ | M06L/pc-2                    | B3LYP/pcJ-2             | 32.85  | -6.61   | 89.97   | -2.01 | 114.20  |
| OHF      | $^2J_{\text{FH}}$ | M06L/pc-2                    | PBE0/pcJ-2              | 33.86  | -6.62   | 90.66   | -2.02 | 115.89  |
| OHF      | $^2J_{\text{FH}}$ | M06L/pc-2                    | M06L/pcJ-2              | 13.95  | -6.86   | 69.57   | -2.01 | 74.65   |
| OHF      | $^2J_{\text{FH}}$ | M06L/aug-pc-2                | PBE0/aug-pcJ-2          | 32.78  | -6.37   | 90.11   | -2.02 | 114.50  |
| OHF      | $^2J_{\text{FH}}$ | M06L/aug-pc-2                | M06L/aug-pcJ-2          | 13.26  | -6.78   | 69.30   | -2.01 | 73.77   |
